# Supplementary material for: cepip: context-dependent epigenomic weighting for prioritization of regulatory variants and disease-associated genes
Source: PubMed Central journal article supplement (PMC5356314; doi:10.1186/s13059-017-1177-3), 2017-03-16
Supplement: 13059_2017_1177_MOESM1_ESM.pdf [file 13059_2017_1177_MOESM1_ESM.pdf]

## Supplementary figure legends

**Fig. S1: Tissue/cell type-specific or generalized logit models trained by selected chromatin features under different controls.** Occurrence indicates the number of models sharing the feature during after feature selection procedure; \* indicates the *P*-value of coefficient for corresponding feature < 0.05; heatmap color is rendered by exponential coefficients. (A) Strict control; (B) Random control without DHS-related features; and (C) Strict control without DHS-related features.

**Fig. S2: Receiver operating characteristic in the low false positive rate spectrum for different generalized context-dependent models.** M1: random control (AUC = 0.626); M2: strict control (AUC = 0.619); M3: random control without DHS-related features (AUC = 0.624); M4: strict control without DHS-related features (AUC = 0.609).

**Fig. S3: The whole genome XYplot of Log(composite probability) and Log(regulatory potential) using ENCODE GM12878 epigenomic annotations.** Pearson correlation coefficient between composite probability and regulatory potential of GM12878 cell line at the genome-wide level shows low dependence ( $r = 0.197$ , *P*-value =  $2.2 \times 10^{-16}$ ).

**Fig. S4: LD proxies of rs12740374 for CEU and YRI populations using 1000 Genomes Phase 1 data.**

**Fig. S5: The long-range interaction patterns for linked SNPs with the index SNP rs12740374.** This figure was plotted using 3DSNP (<http://biotech.bmi.ac.cn/3dsnp>).

**Fig. S6: The Q-Q plots of context-dependent rheumatoid arthritis GWAS signal enrichment for other cell lines.** The top 5% SNPs using blood-derived cell (GM12878 and Mo-CD14+)-dependent prioritization shifts leftmost against permutated GWAS signals. Abbreviations: BLD - Blood; LNG - Lung; SKIN - Skin; BONE - Bone; LIV - Liver; VAS - Vascular; MUS - Muscle; BRN - Brain; CRVX - Cervix; BRST - Breast.

**Fig. S7: Impact of allele frequency on the results of random sampling.** (A) Allele frequency distribution of the context-dependent top 5% SNPs are similar to that of the randomly sampled SNPs without considering allele frequency match. (B) The empirical *P*-values of allele frequency-matched permutations for blood cell lines (Mo-CD14+ and GM12878, orange bars) are more significant than other tissue/cell types. (C) Q-Q plot of the blood (Mo-CD14+ and GM12878), liver (HepG2) and skin (NHDF-Ad) cell lines using allele frequency-matched random sampling.

**Fig. S8: Inflation factors ( $\lambda$ ) of the top 5% and top 1% SNPs using different cell types.** SNPs in the MHC region were removed. Abbreviations: BLD - Blood; LNG - Lung; SKIN - Skin; BONE - Bone; LIV - Liver; VAS - Vascular; MUS - Muscle; BRN - Brain; CRVX - Cervix; BRST - Breast.

**Fig. S9: Top-ranked (5%) SNPs display more leftward shift than lower-ranked ones (5-10% or last 5%).** (A) Q-Q plot of the blood cell lines (GM12878). (B) Q-Q plot of bone cell lines (OSTEO).

**Fig. S10: Similar patterns remain after removing known rheumatoid arthritis loci.** (A) Q-Q plots of context-dependent RA GWAS signal enrichment for blood cell line (GM12878) and other non-relevant cell lines. (B) Q-Q plots of context-dependent RA GWAS signal enrichment for blood cell line (Mo-CD14+) and other non-relevant cell lines. (C) The top 5% SNPs display leftmost shifts from permuted GWAS signals compared to lower-ranked ones (5-10% or last 5%) for Mo-CD14+ cells (blood), GM12878 cells (blood) and osteoblast primary cells (bone). Abbreviations: BLD - Blood; LIV - Liver; SKIN - Skin; MUS - Muscle; BONE - Bone.

**Fig. S11: Chromatin features around the moderately associated RA SNP rs874628 (GWAS *P*-value = 0.00036).** rs874628 was prioritized using blood cell (Mo-CD14+) epigenomic profiles. It is located in the genomic regions enriched with

H3K4me1 and DHS signals (highlighted region), which are specific in blood Mo-CD14+ cells.

**Fig. S12: Context-dependent prioritization increases the ratio of effective number of independent markers on all chromosomes.** Both context-dependent and composite prioritization significantly increased the ratio compared with original GWAS signals, indicating the context-dependent model improved the discovery of GWAS SNPs by identifying more LD-independent signals.  $^{\#}P < 0.05$  compared with original GWAS signal.

**Fig. S13: Percentage of improved and worsened genes and eGenes after context-dependent weighting.** Using blood cell line (Mo-CD14+ and GM12878)-dependent weighting to detect RA-associated genes, both genes and eGenes showed higher percentages in improved groups and lower percentages in worsened groups.

**Fig. S14: Context-dependent epigenomic weighting increases the statistical power of the detection of disease-associated genes.** Genes detected using blood cell line-specific  $W\_SNP$  in the smaller RA cohort tended to be more significant genes than those detected in the larger cohort. The y-axis is the average  $-\log_{10}(P\text{-value})$  of genes detected in the larger cohort. The four blood cell lines are marked in yellow and other cell lines are marked in green.



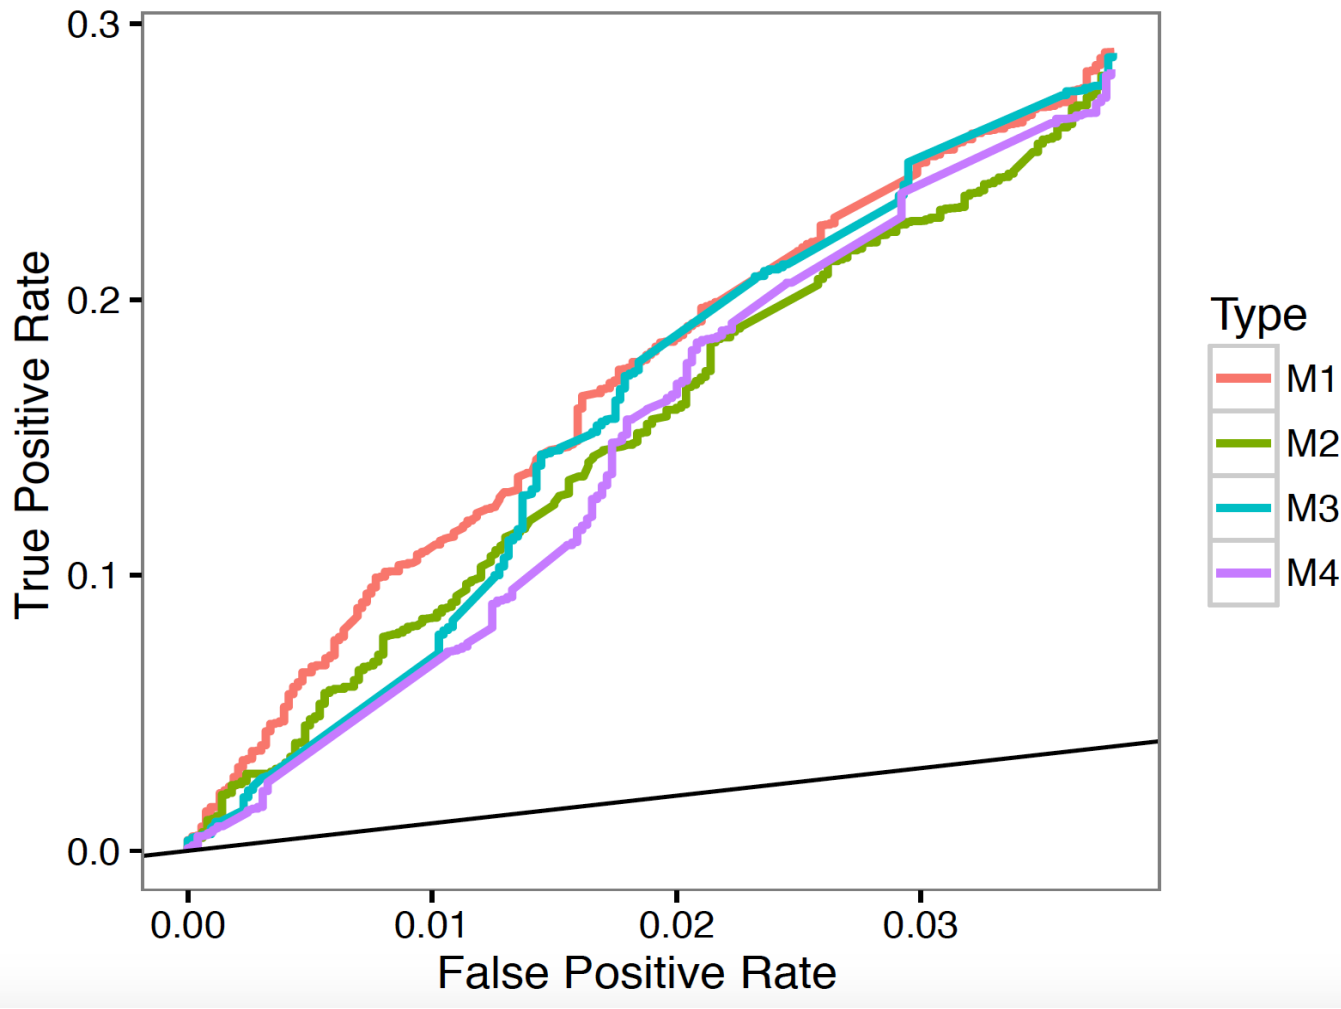

**Fig. S2**

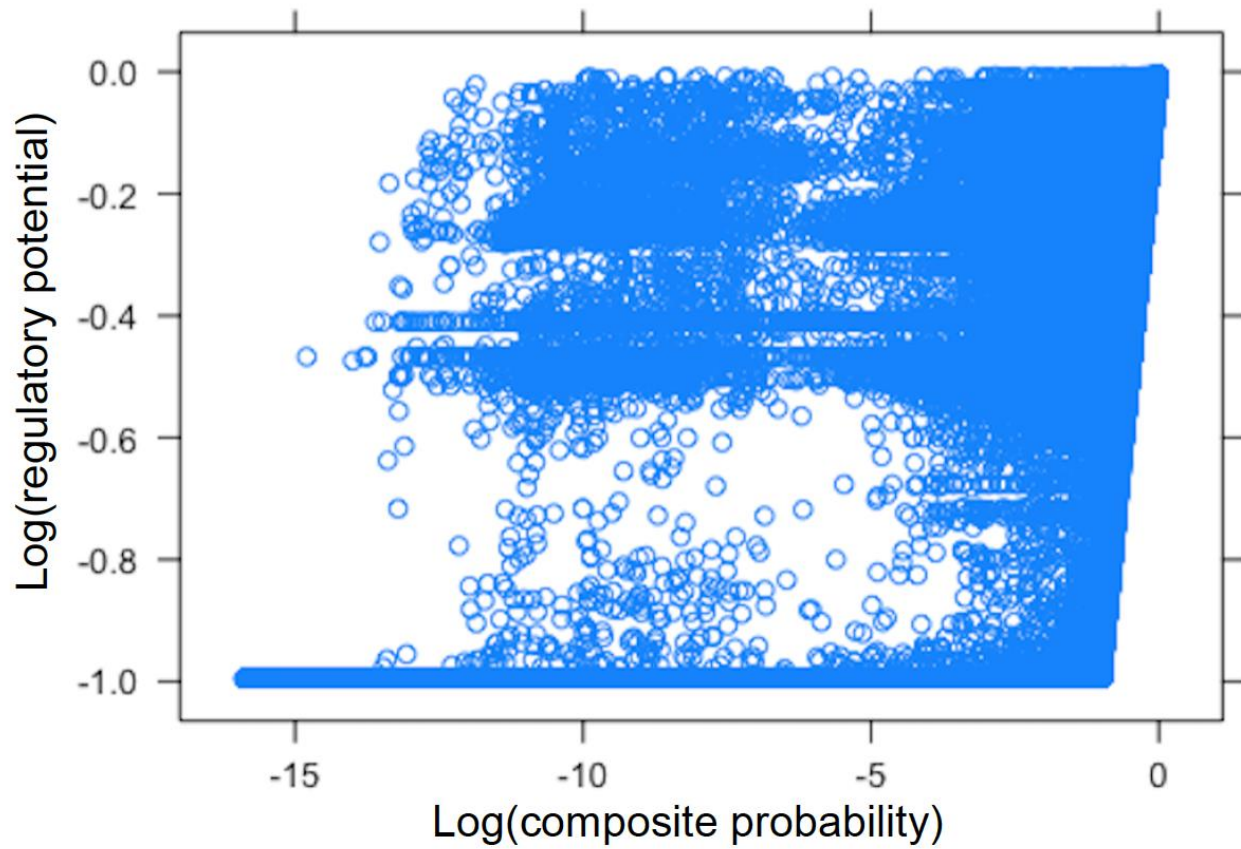

**Fig. S3**

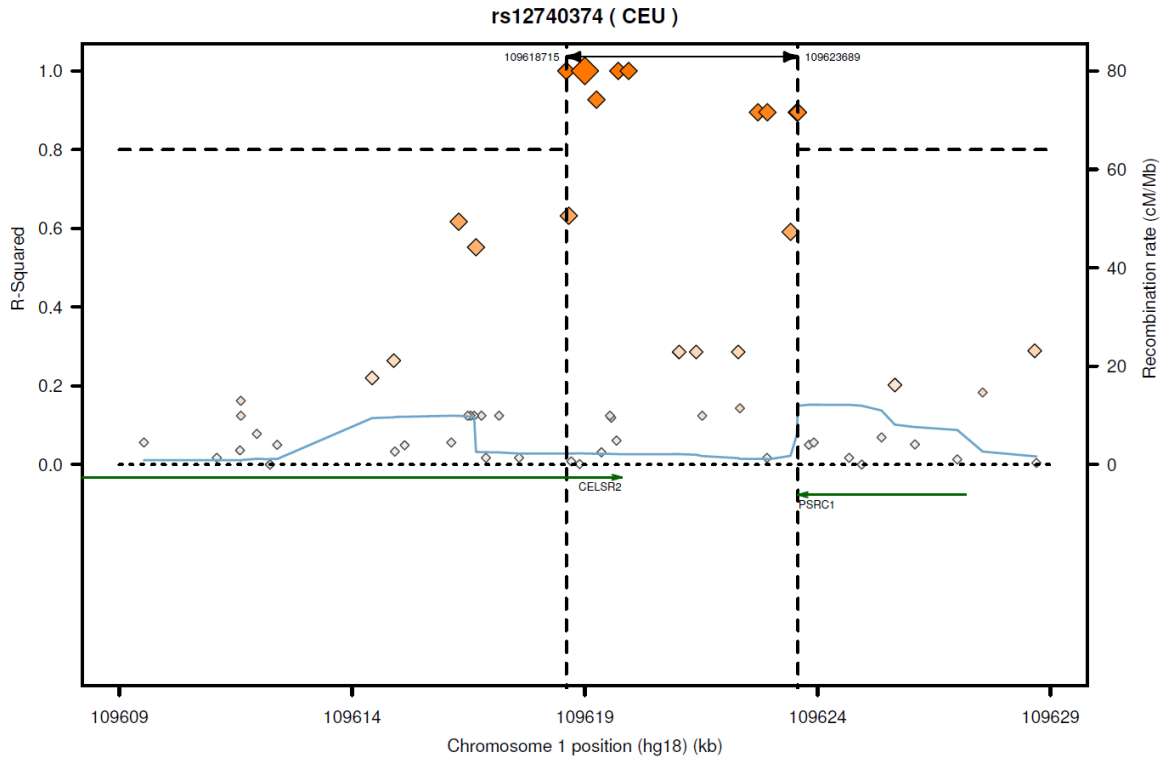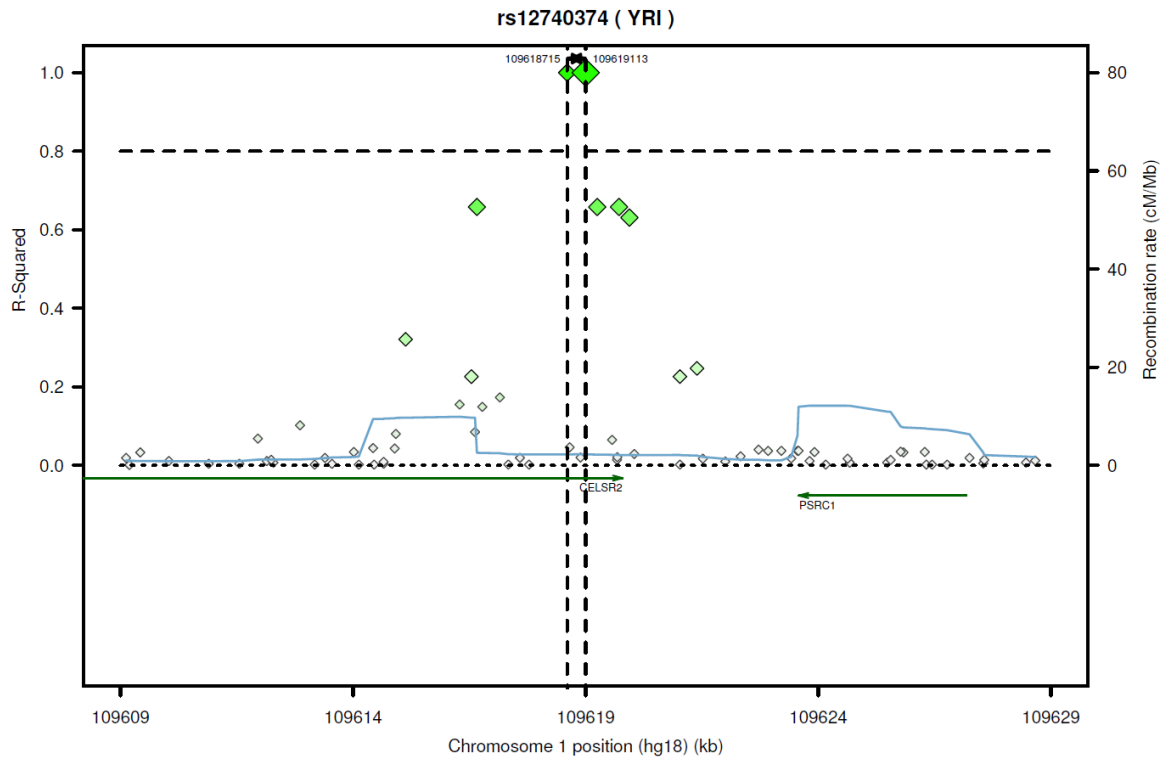

**Fig. S4**

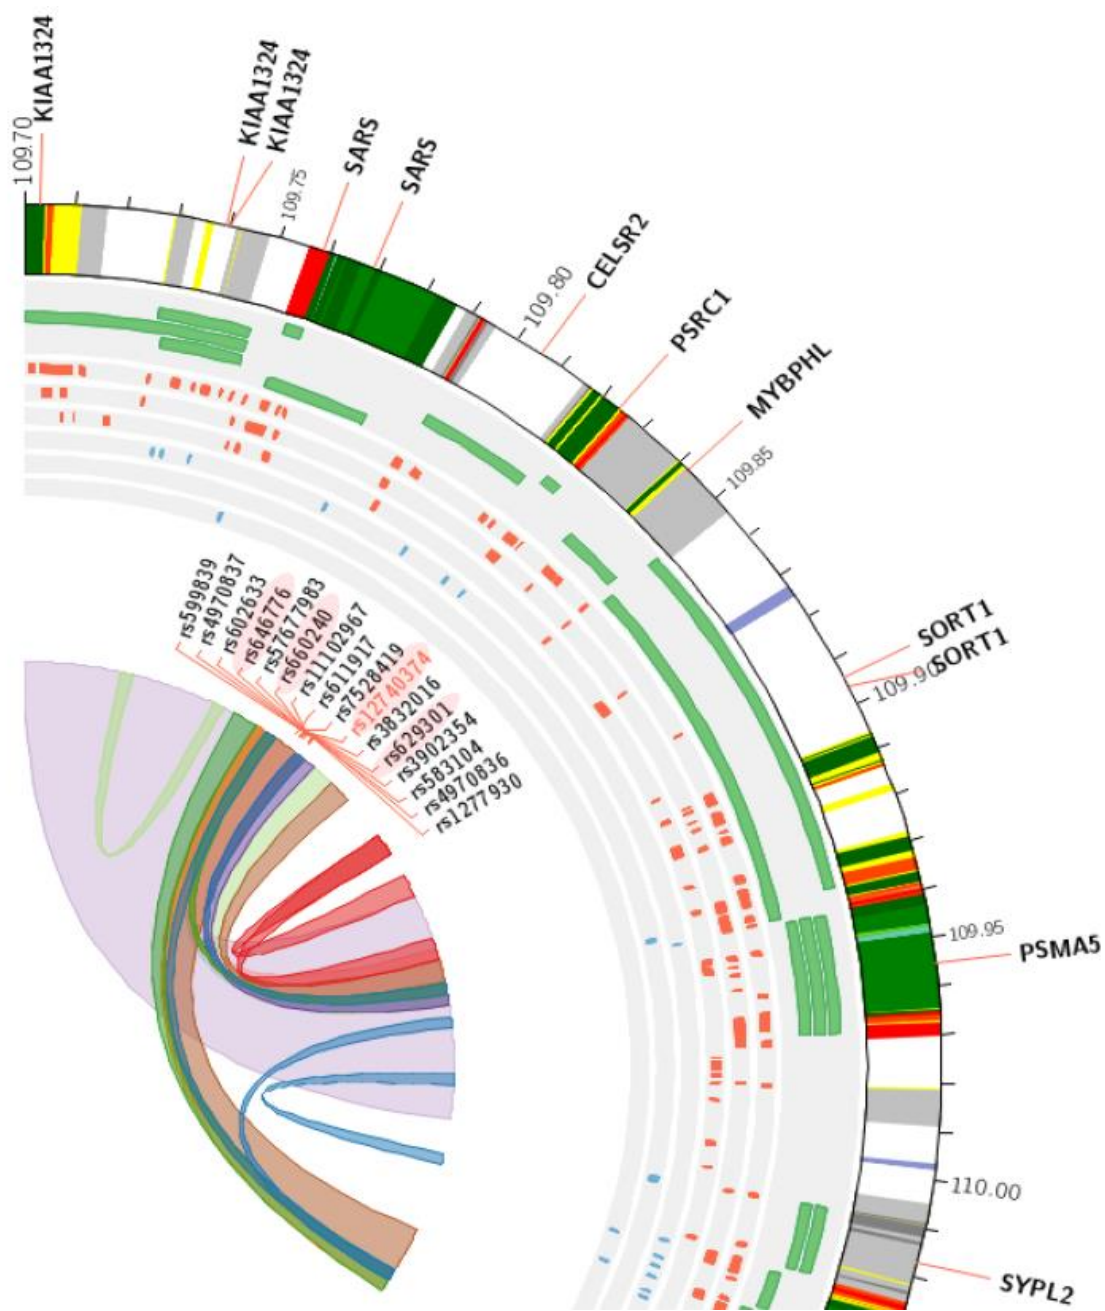

**Fig. S5**



**A**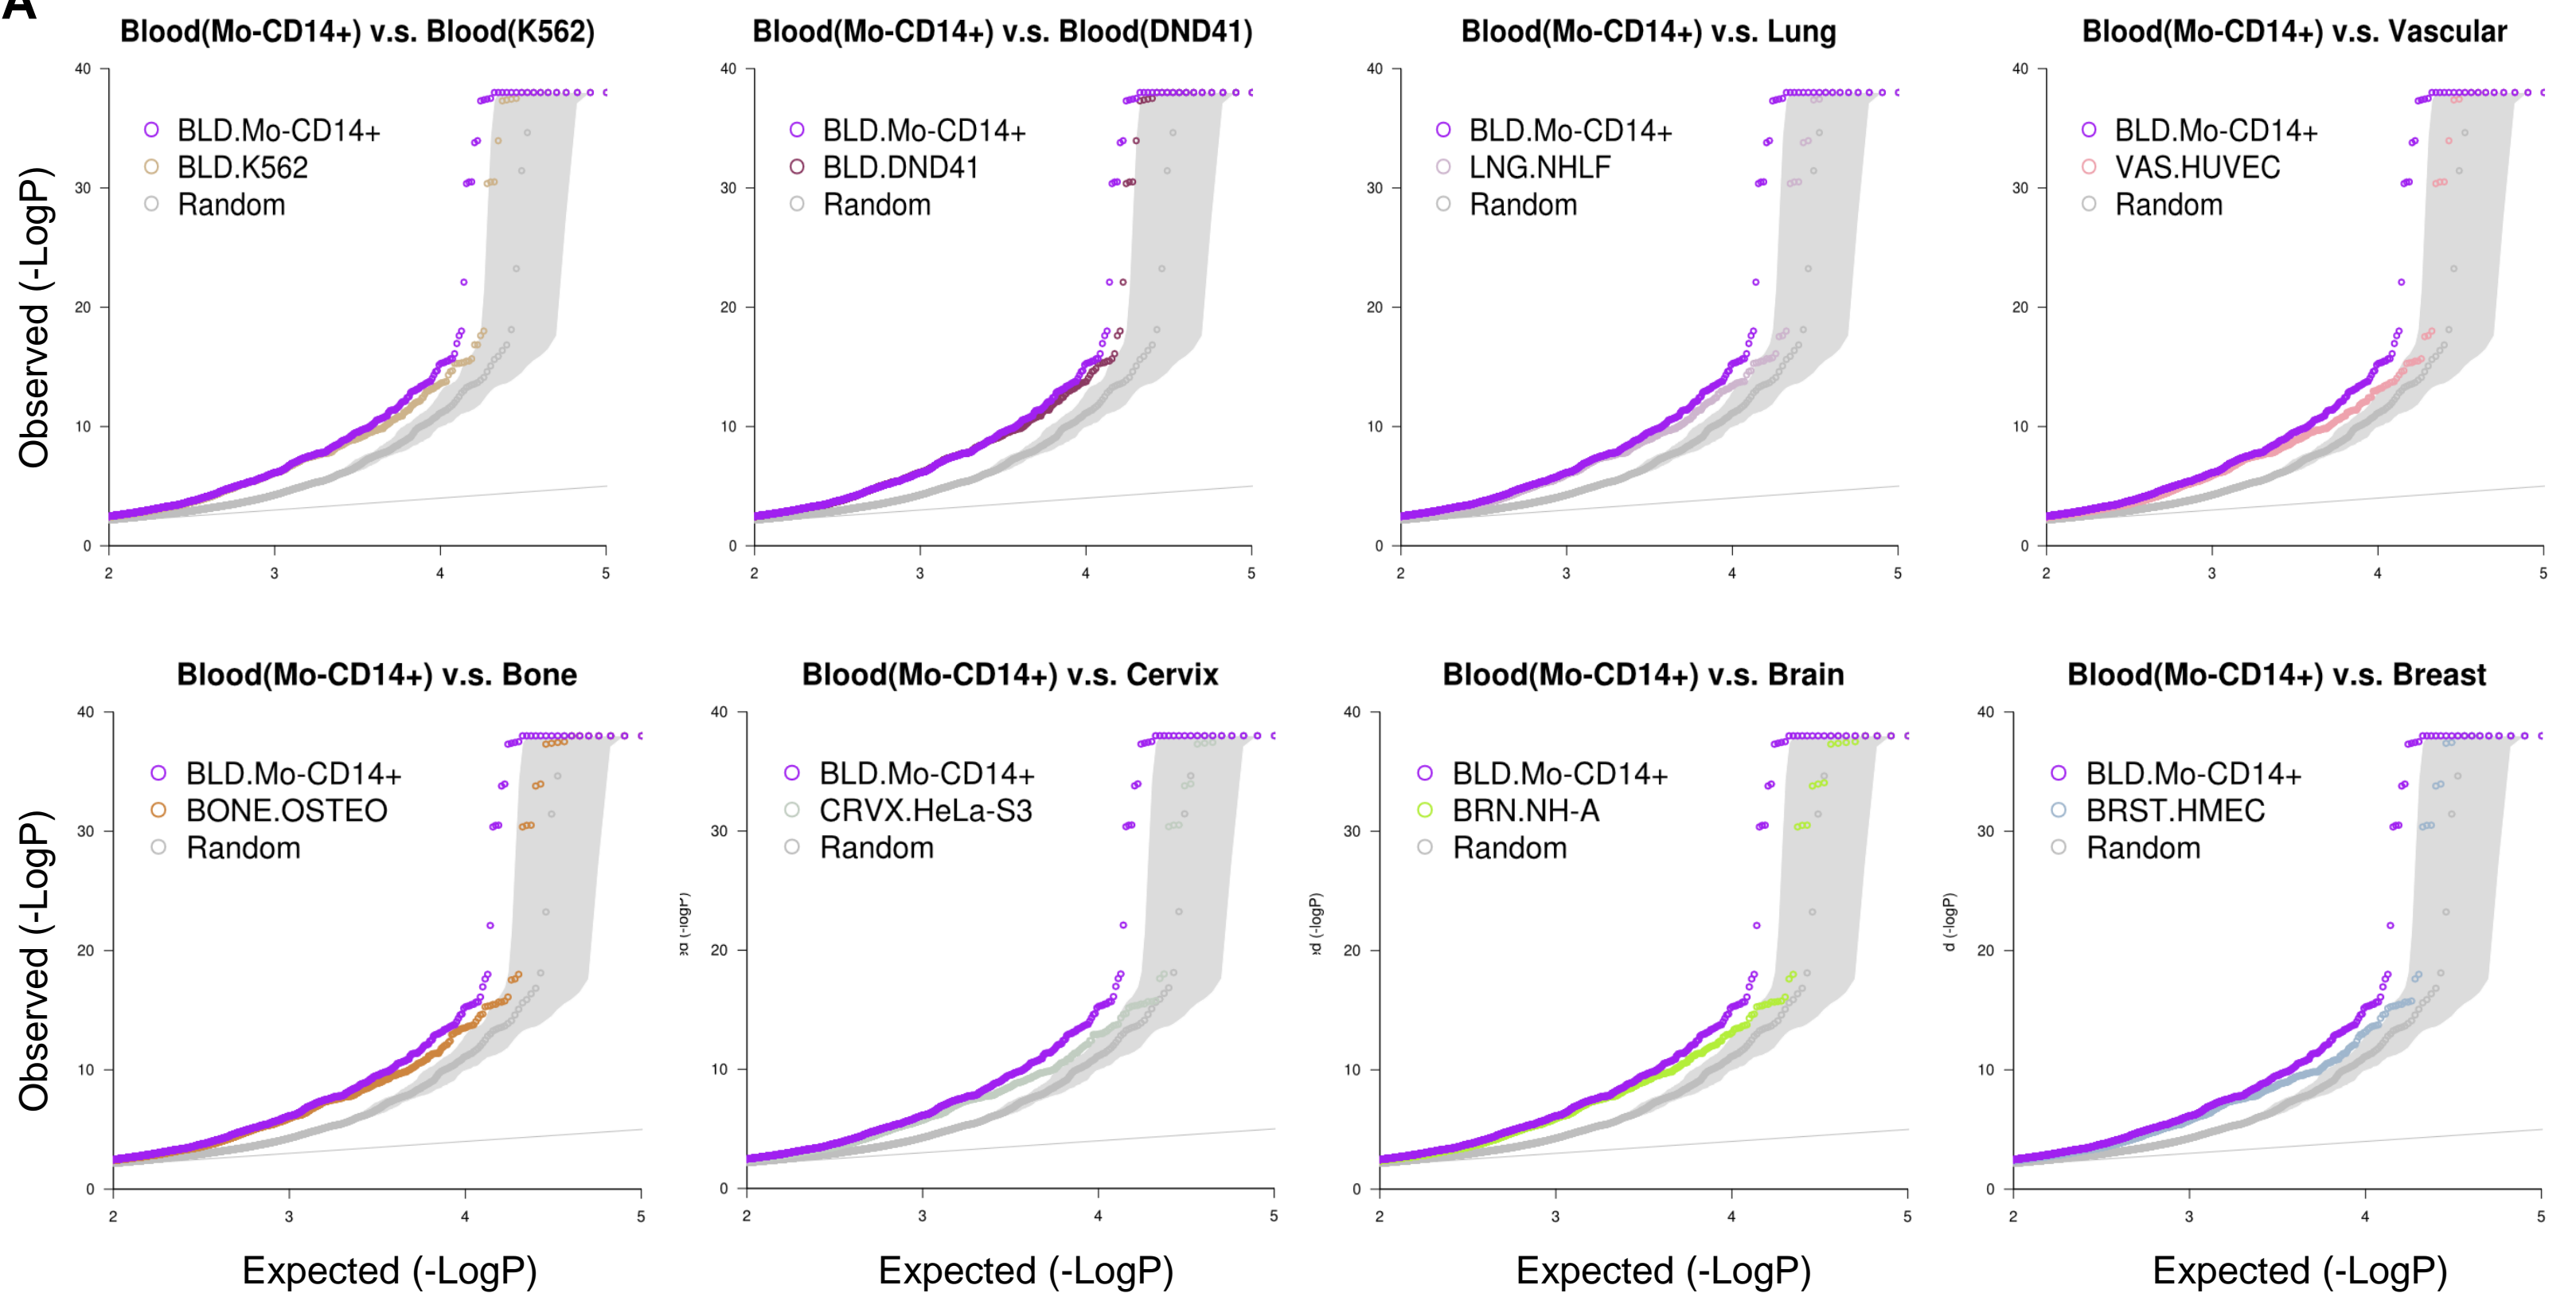**B**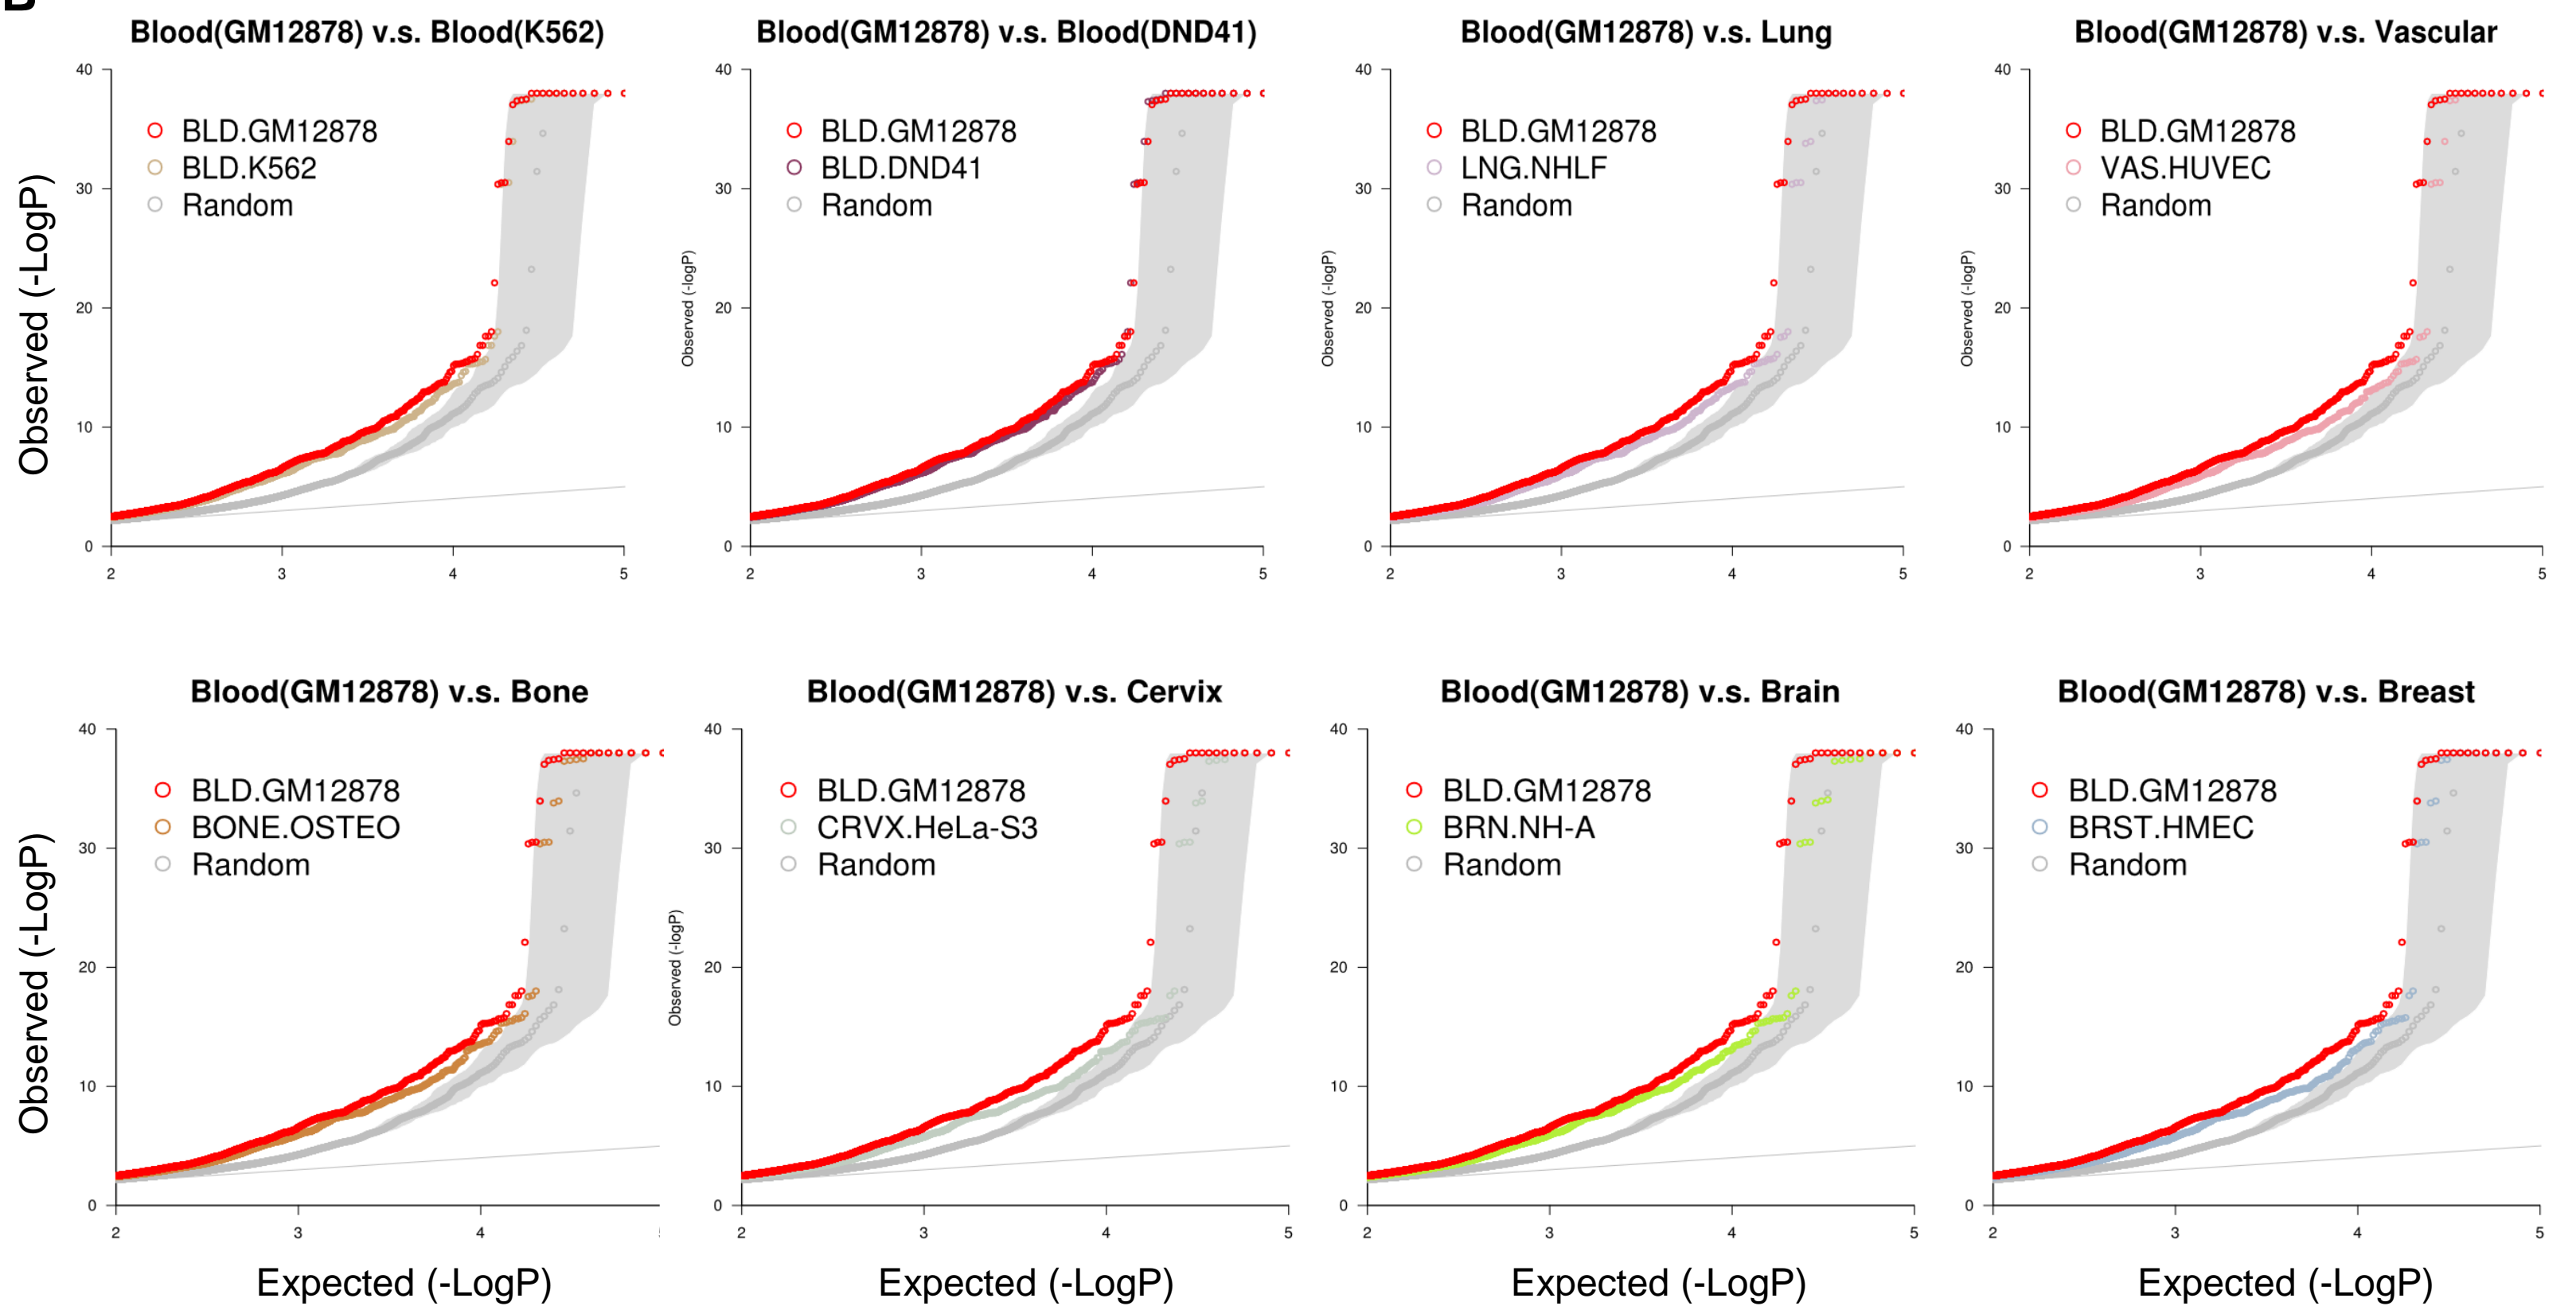**Fig. S6**

**A**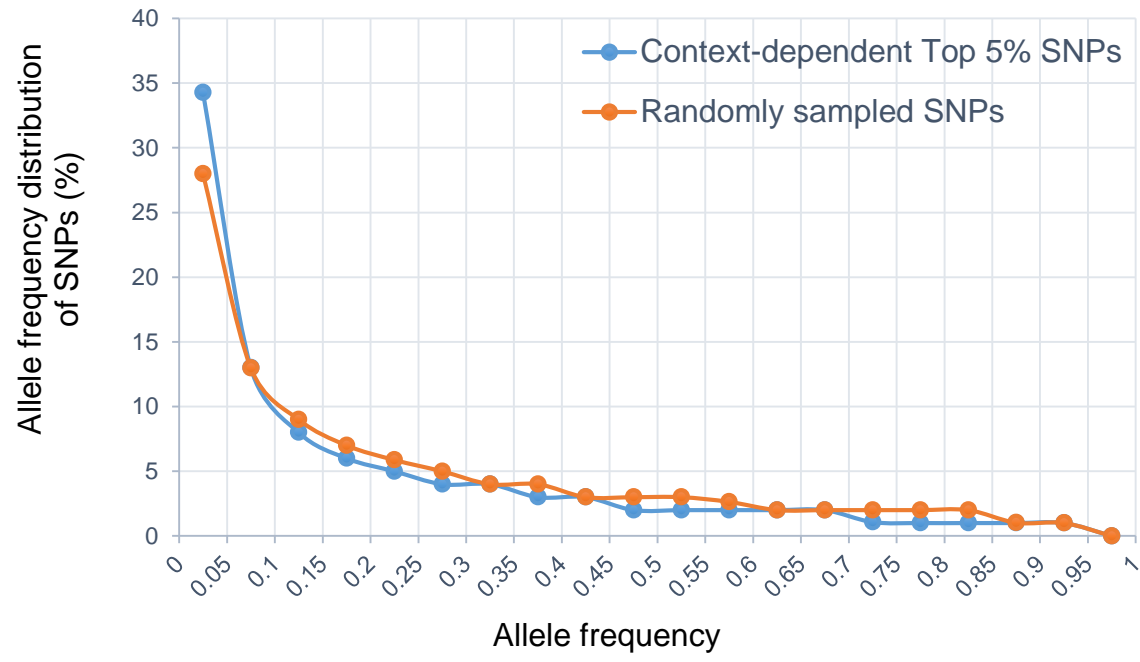**B**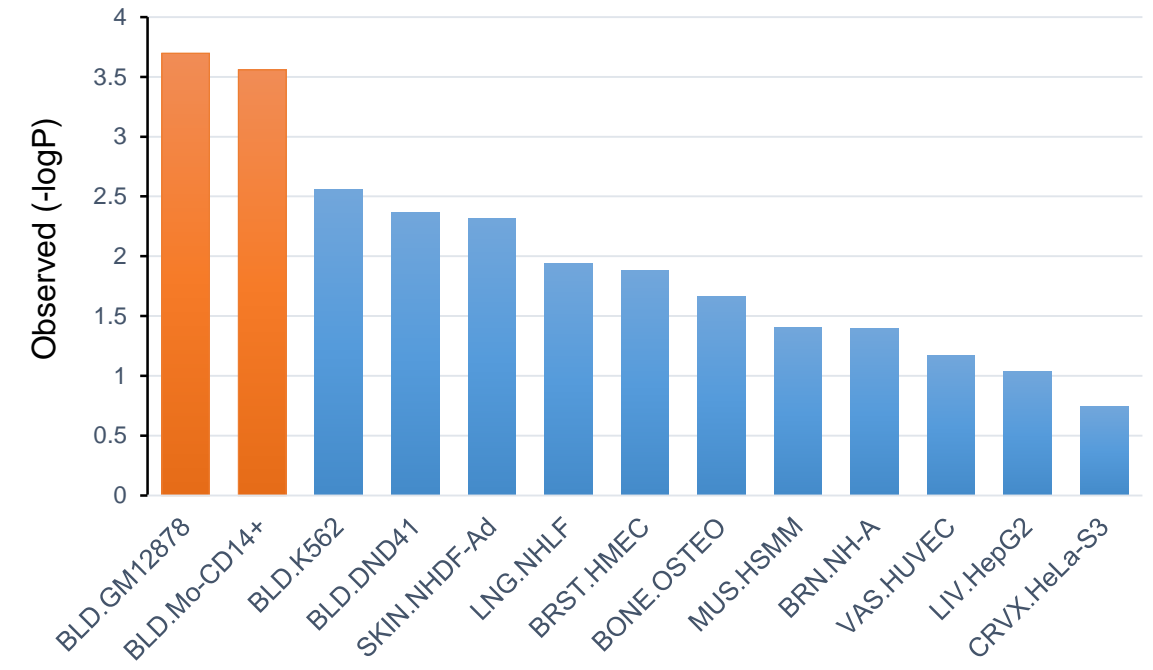**C**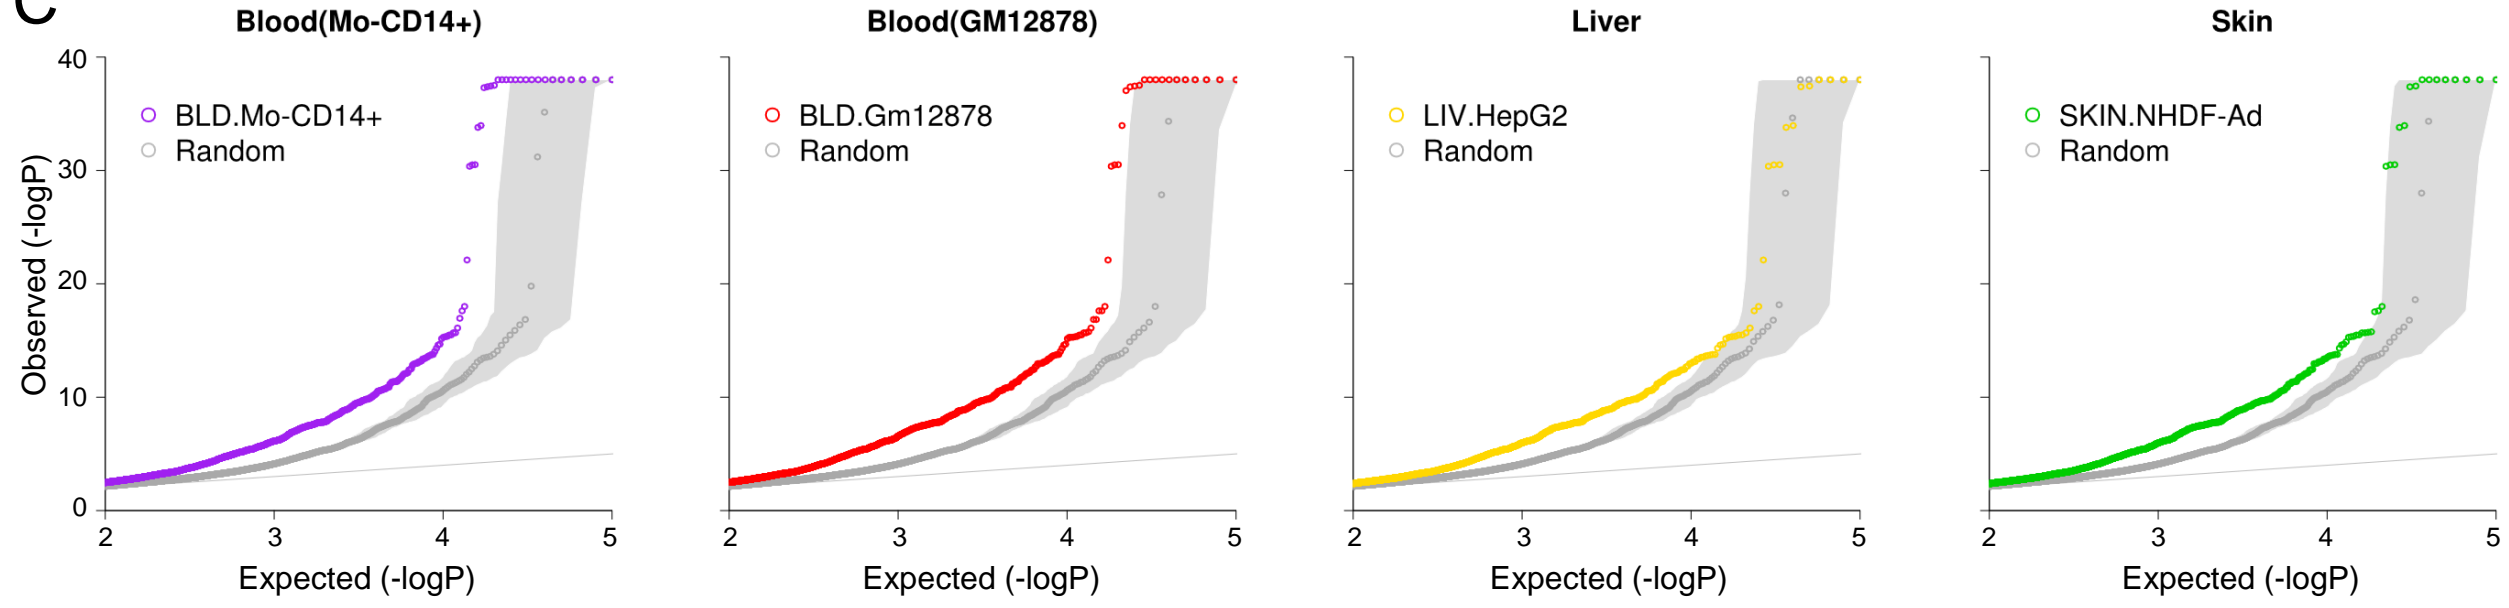**Fig. S7**

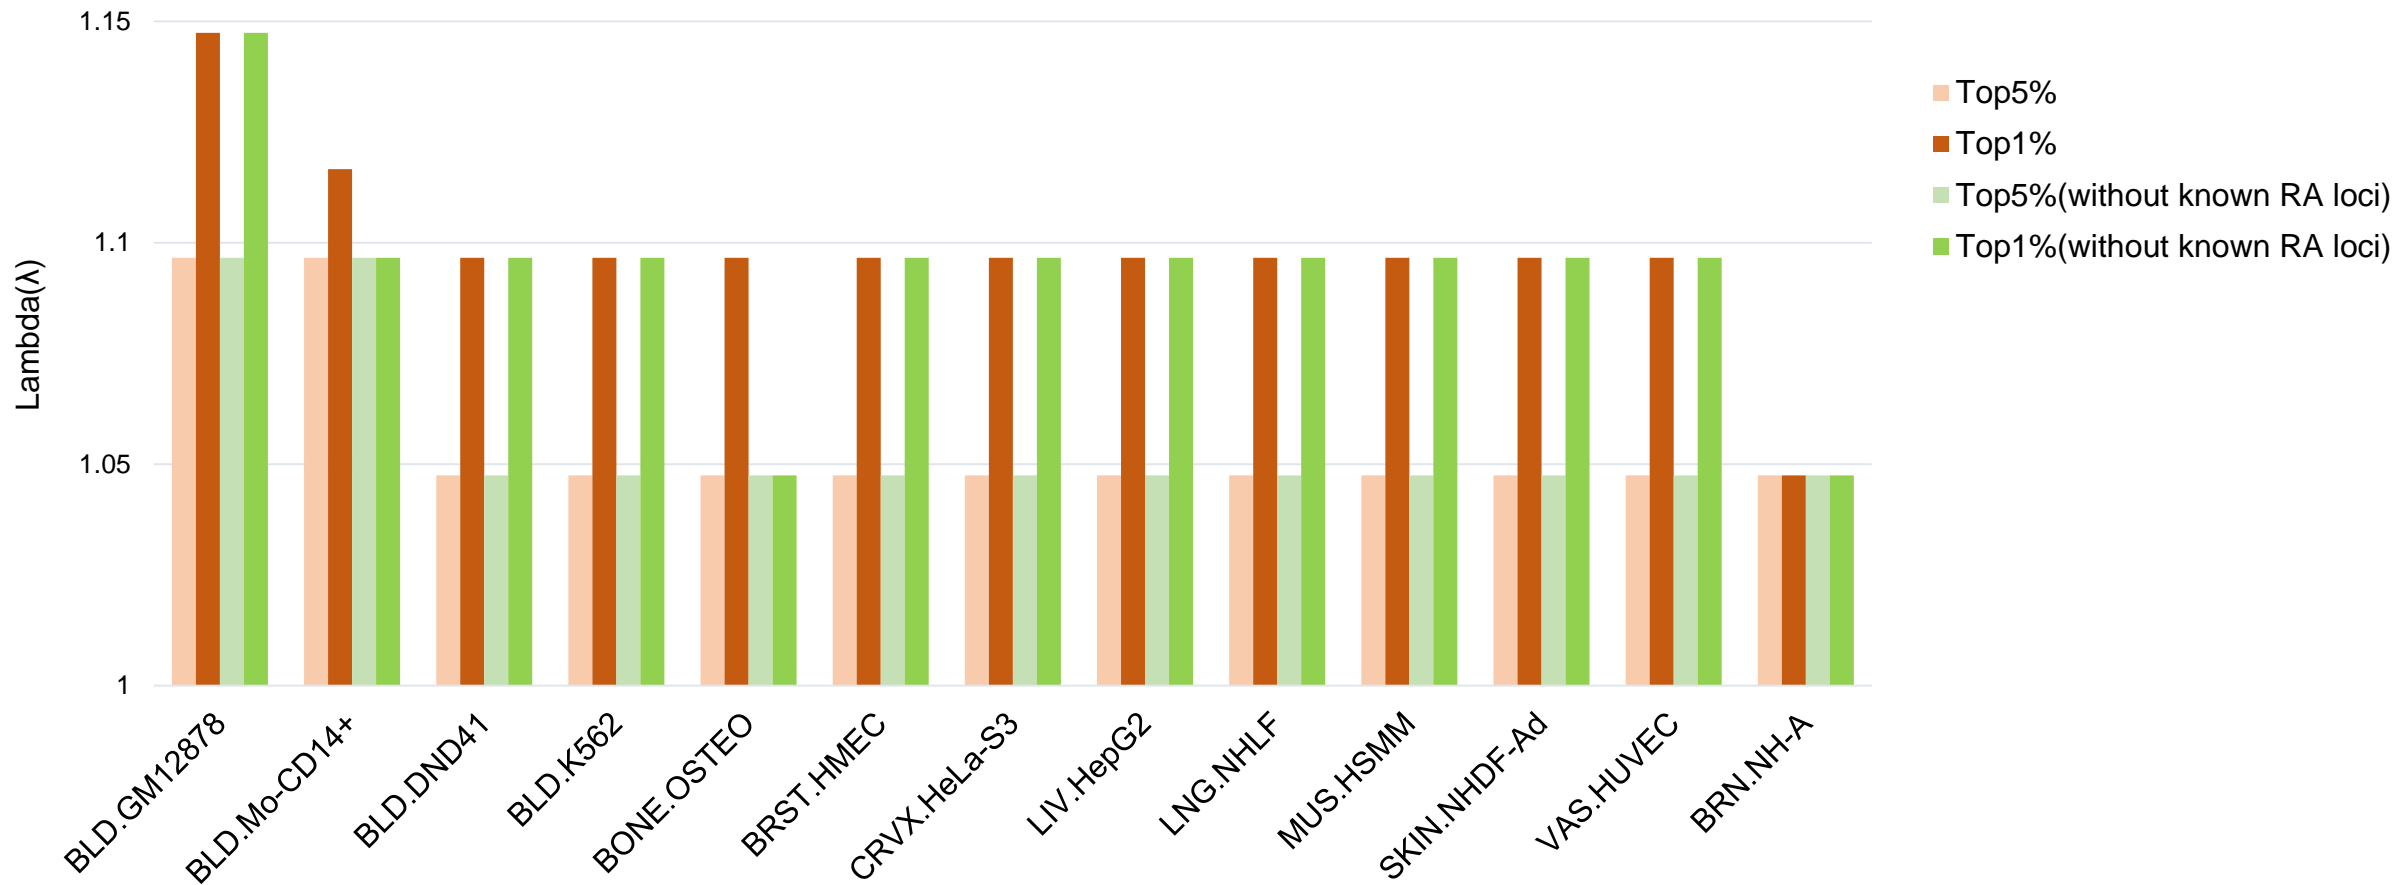

**Fig. S8**

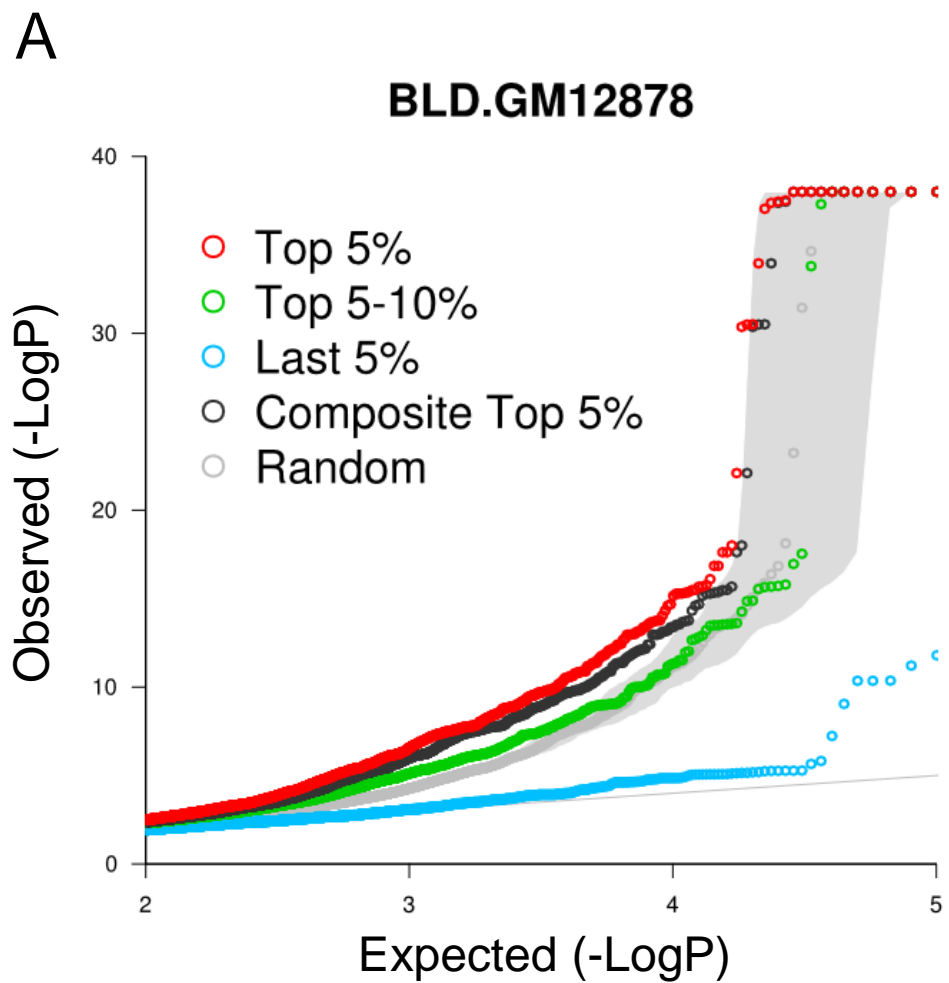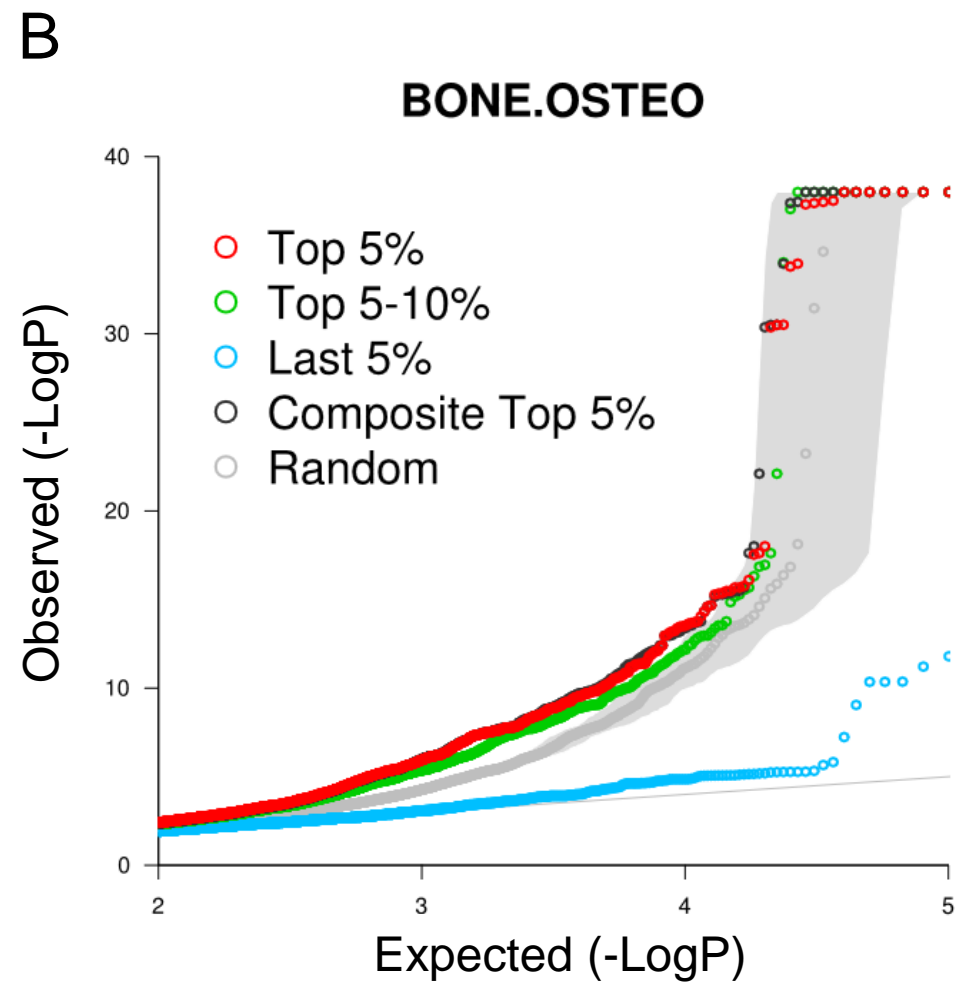

**Fig. S9**

**A****Blood(GM12878) v.s. Skin****Blood(GM12878) v.s. Muscle****Blood(GM12878) v.s. Liver**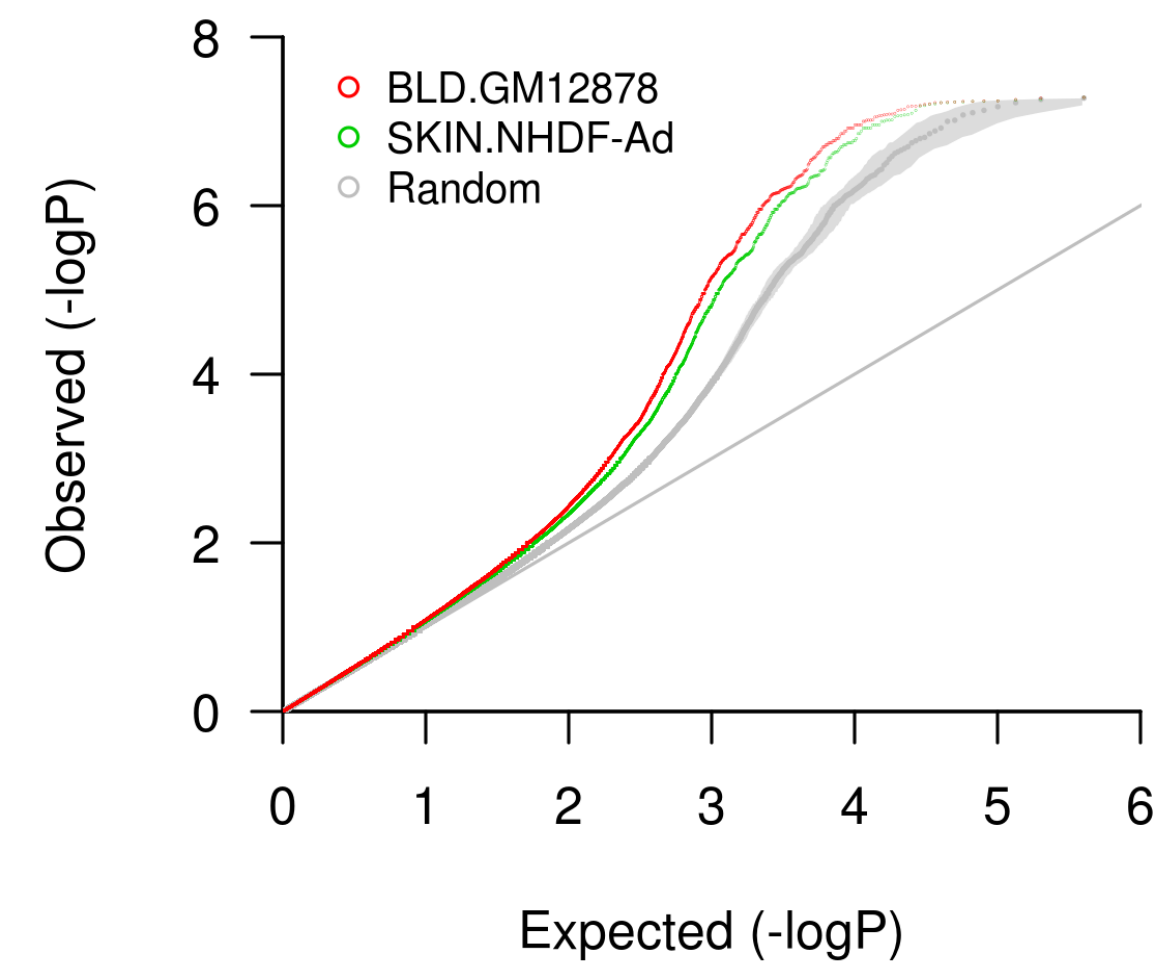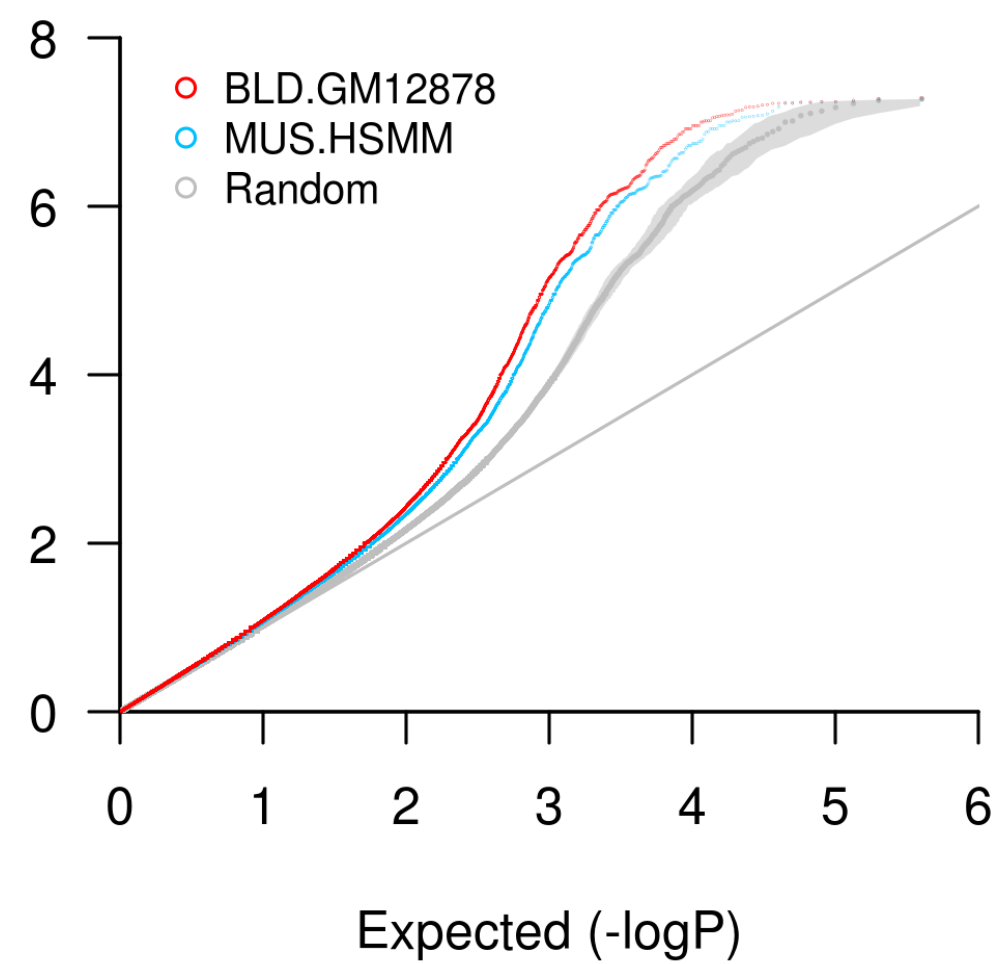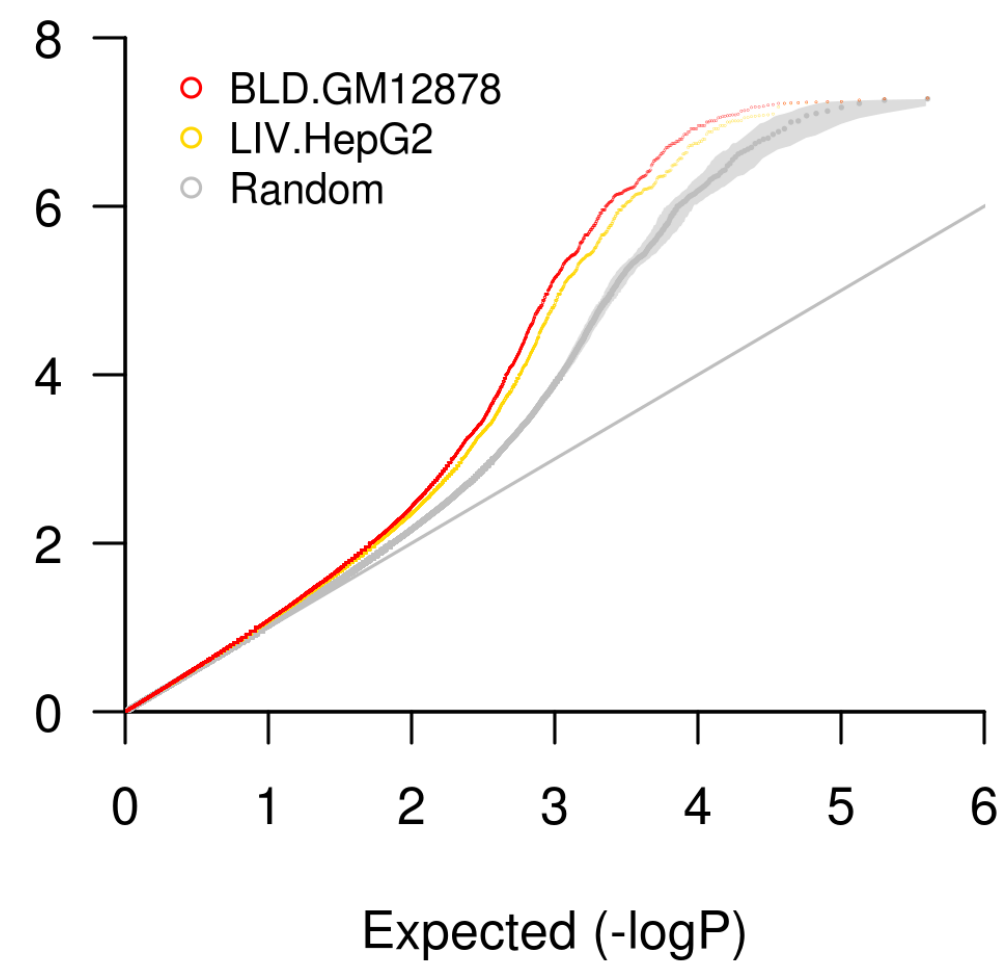**B****Blood(Mo-CD14+) v.s. Skin****Blood(Mo-CD14+) v.s. Muscle****Blood(Mo-CD14+) v.s. Liver**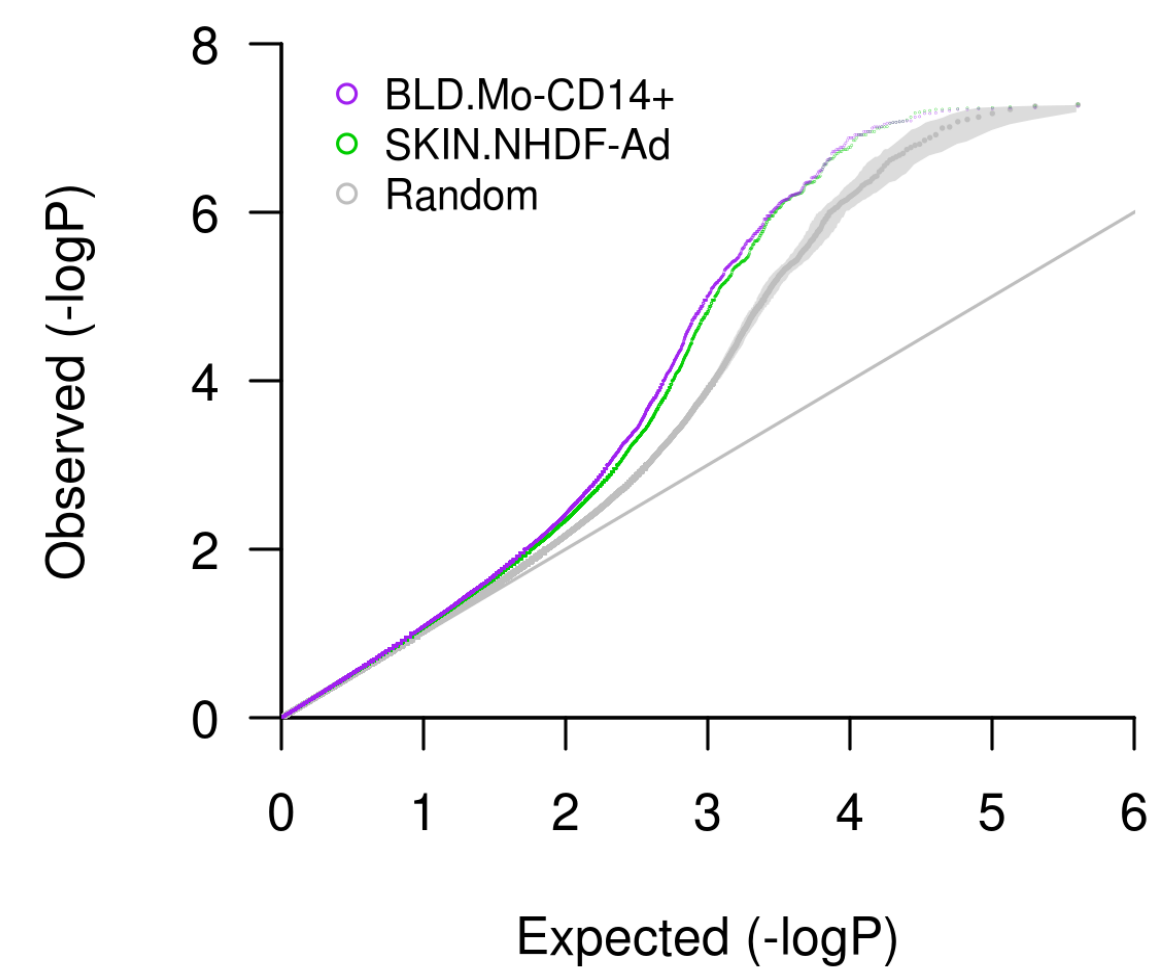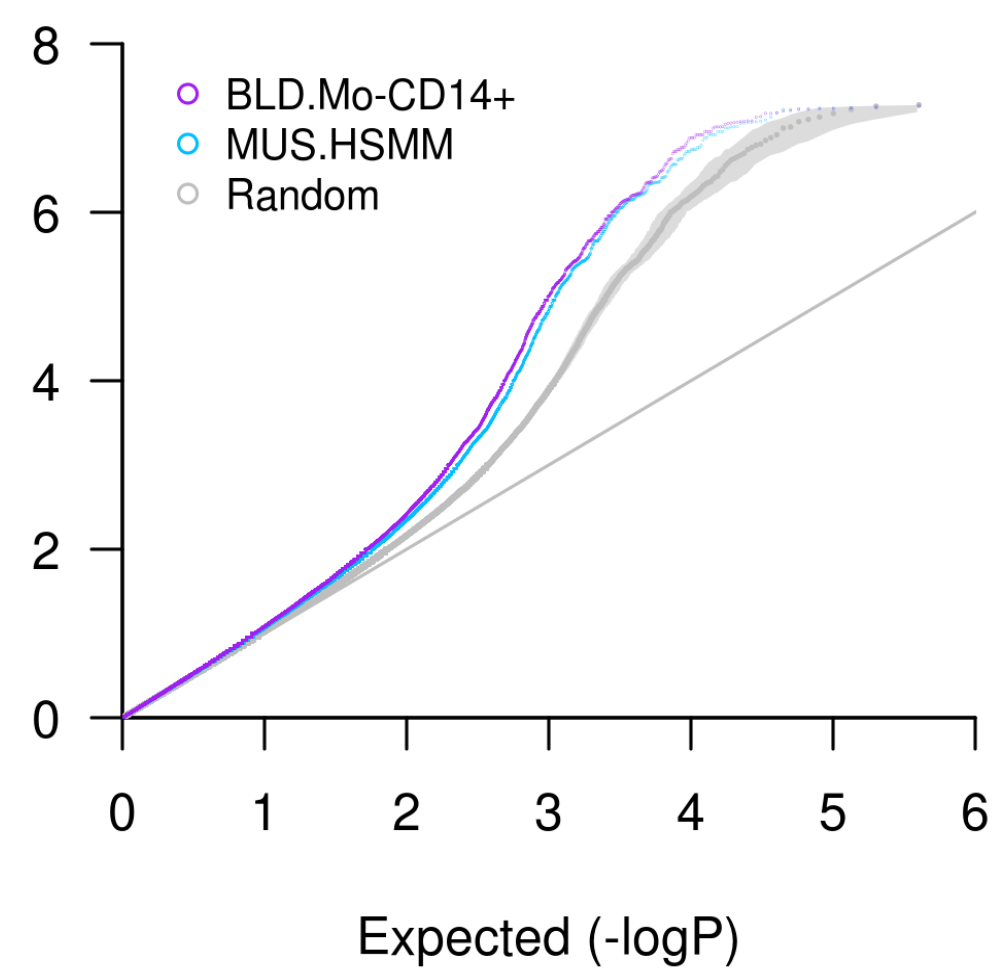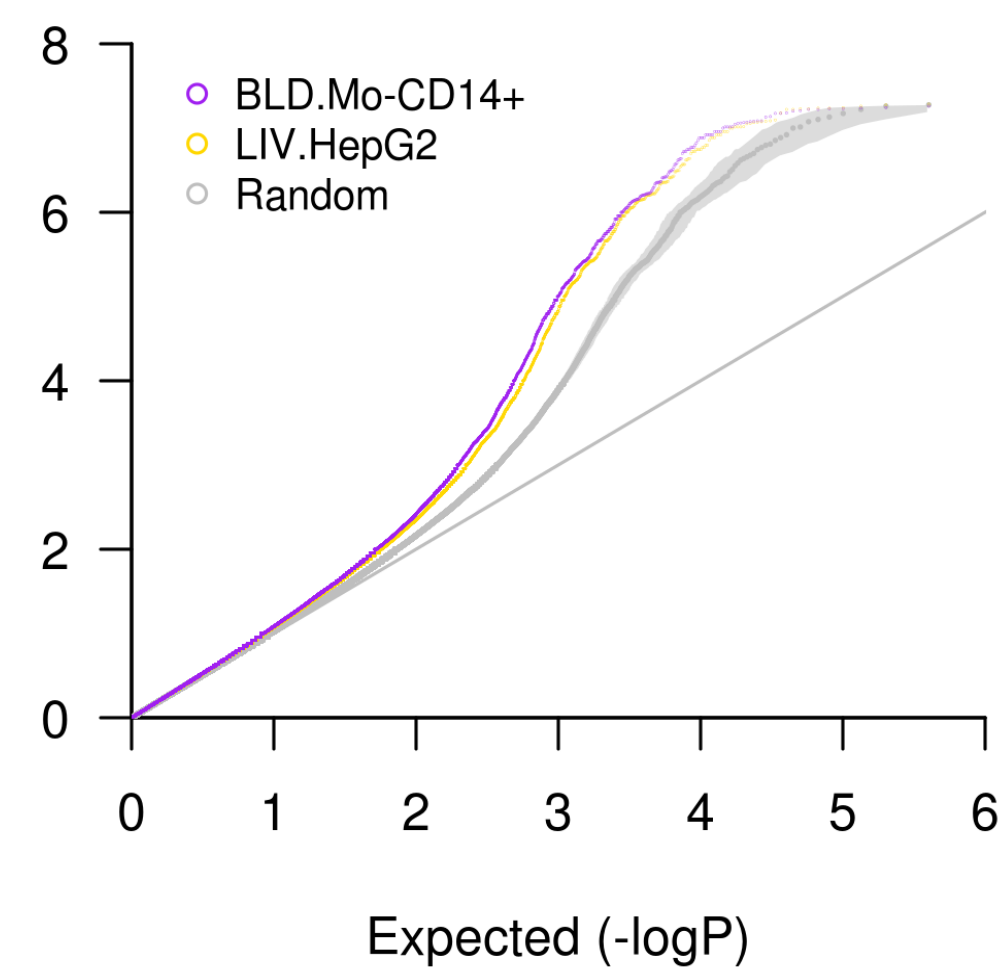**C****BLD.Mo-CD14+****BLD.GM12878****BONE.OSTEO**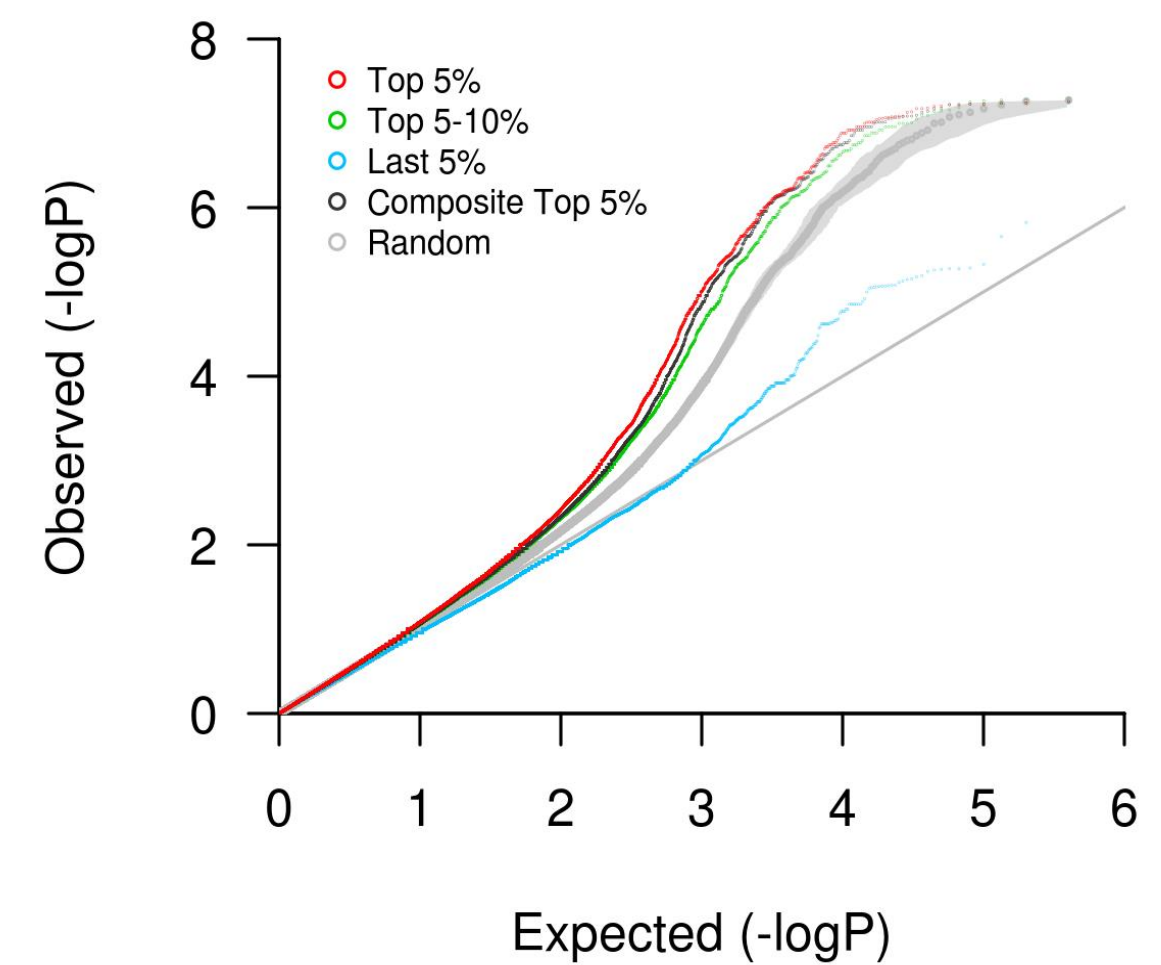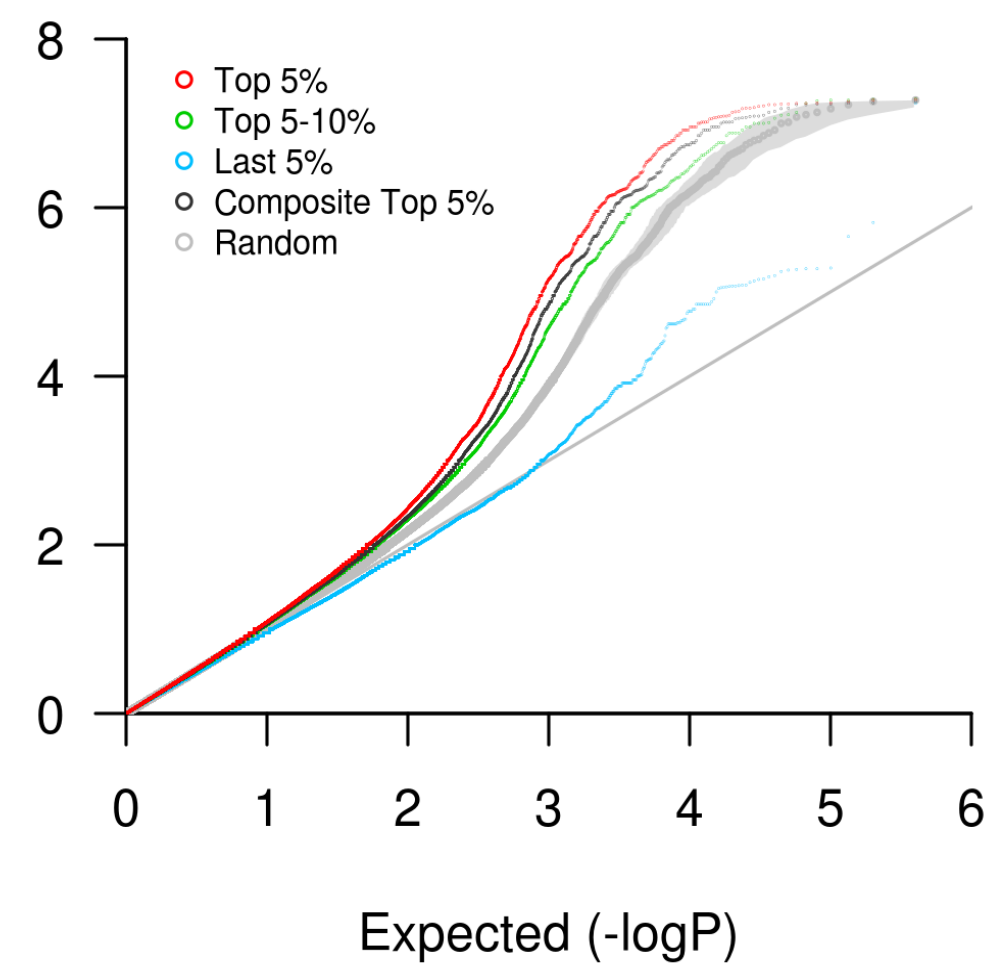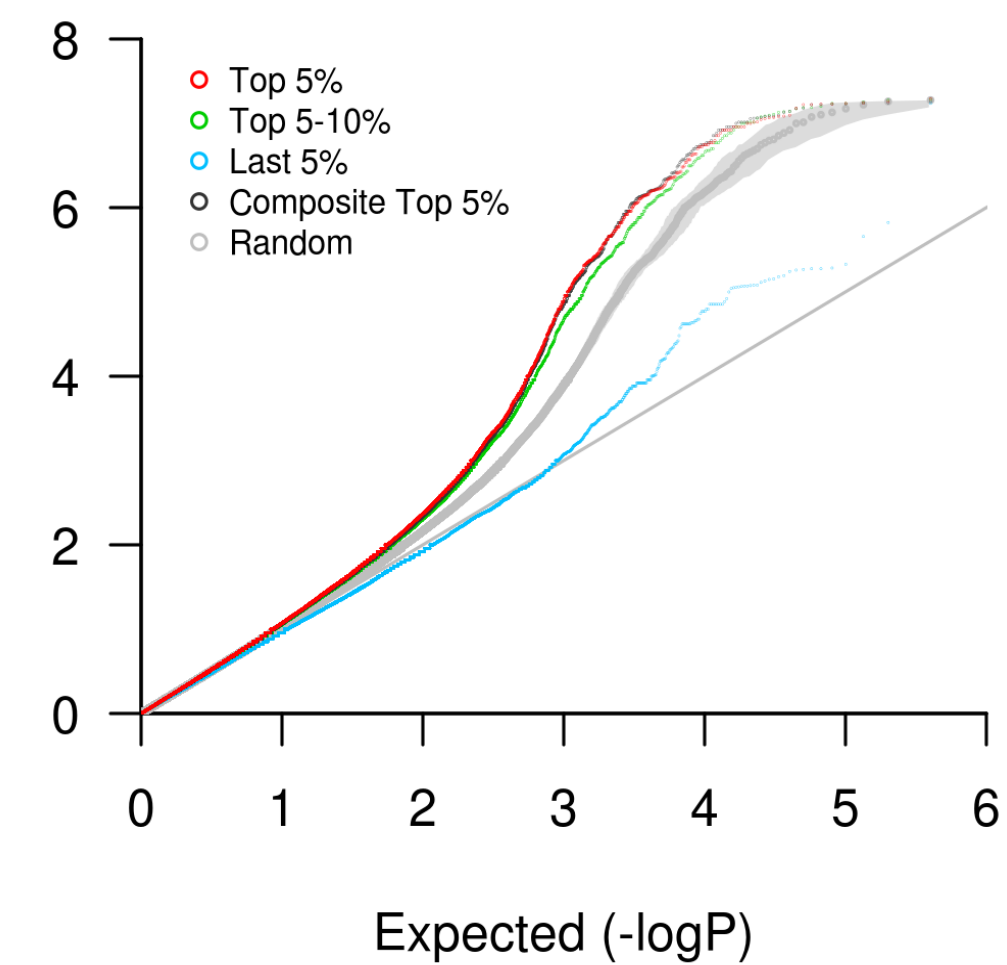**Fig. S10**

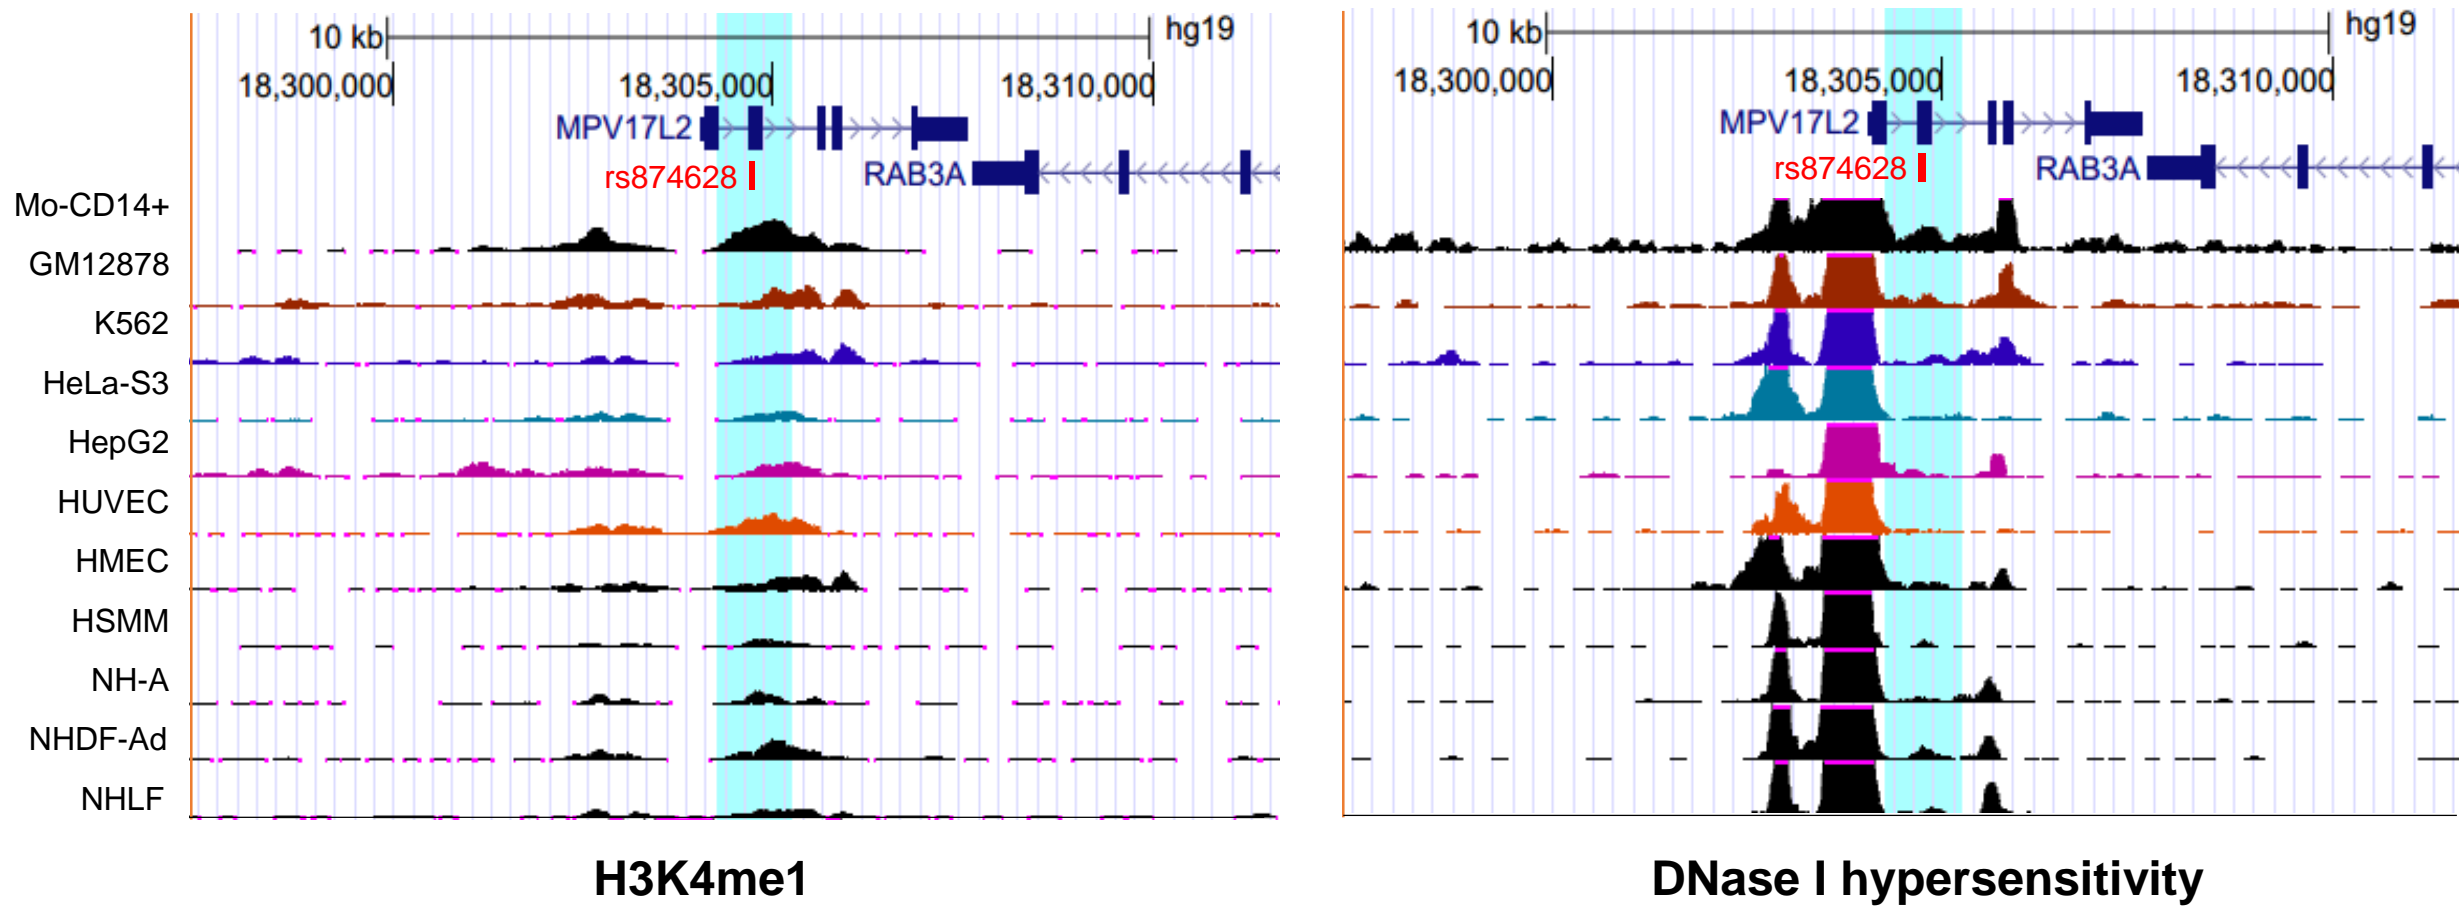

Fig. S11

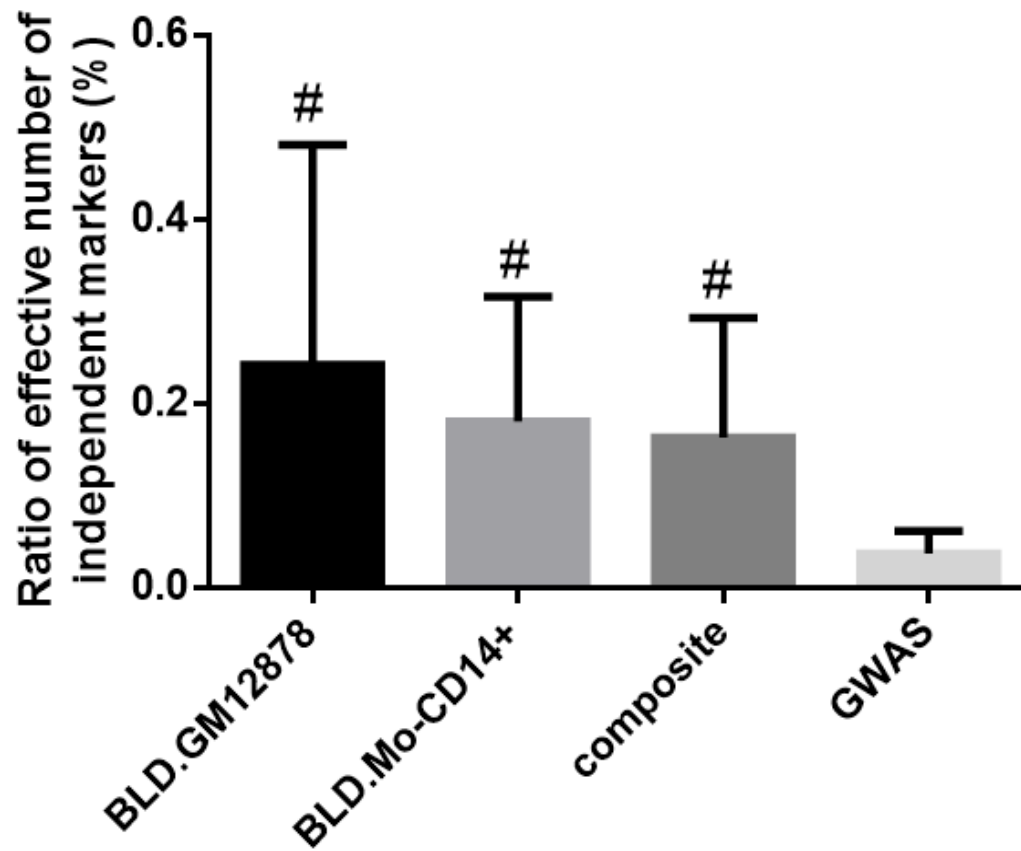

Fig. S12

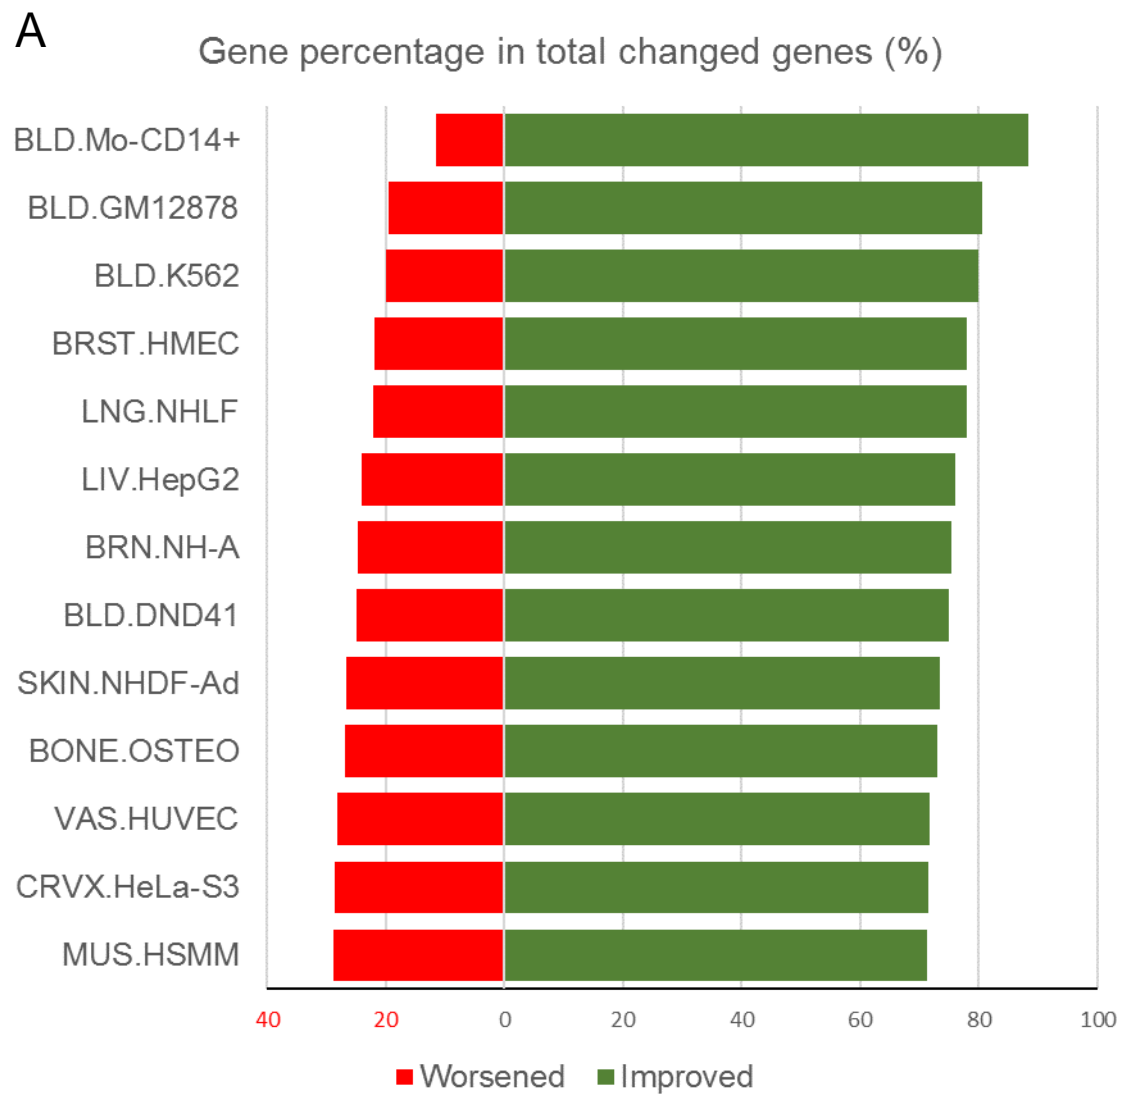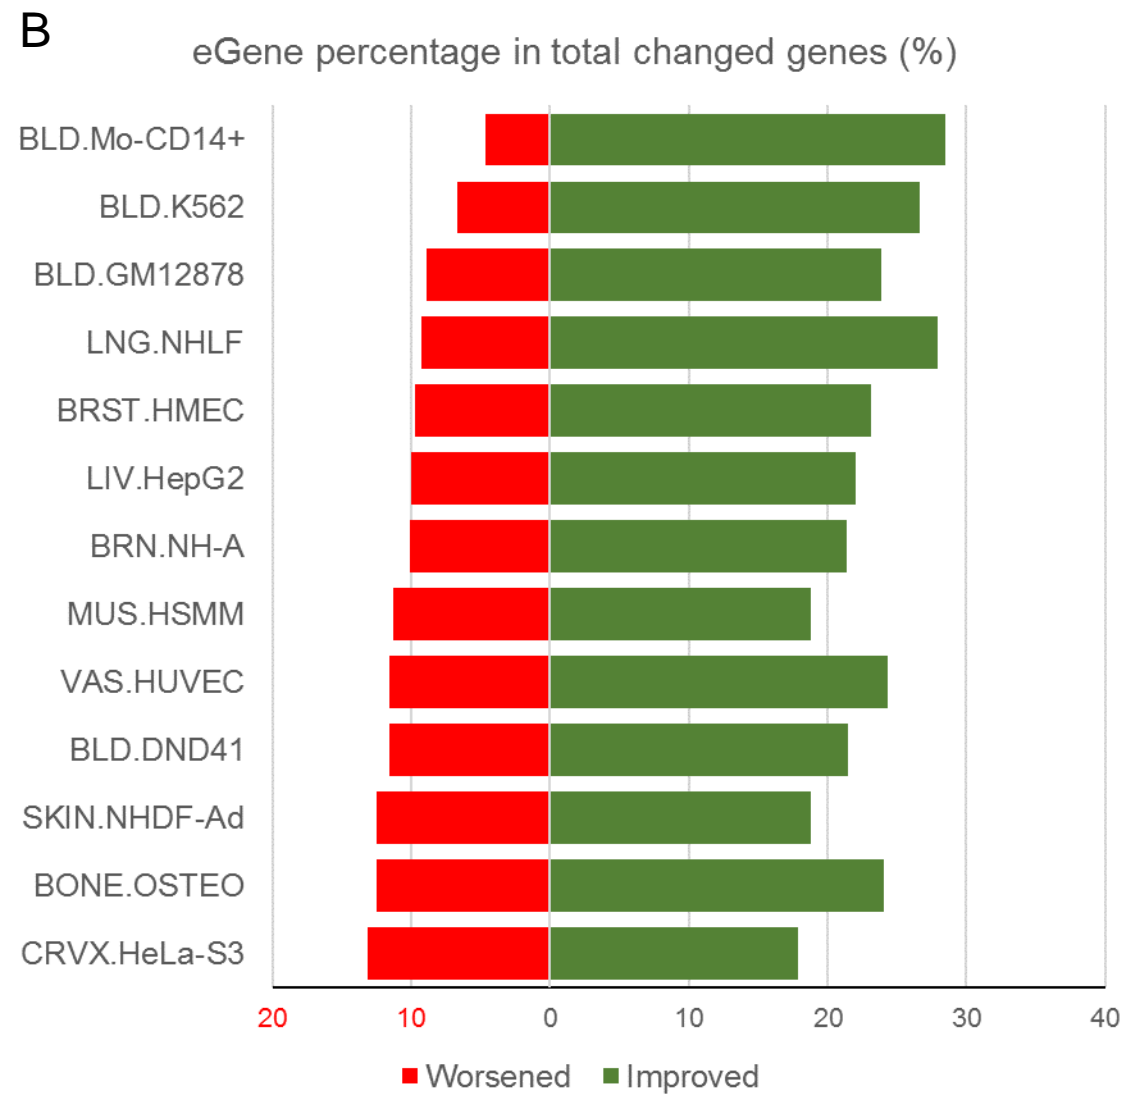

**Fig. S13**



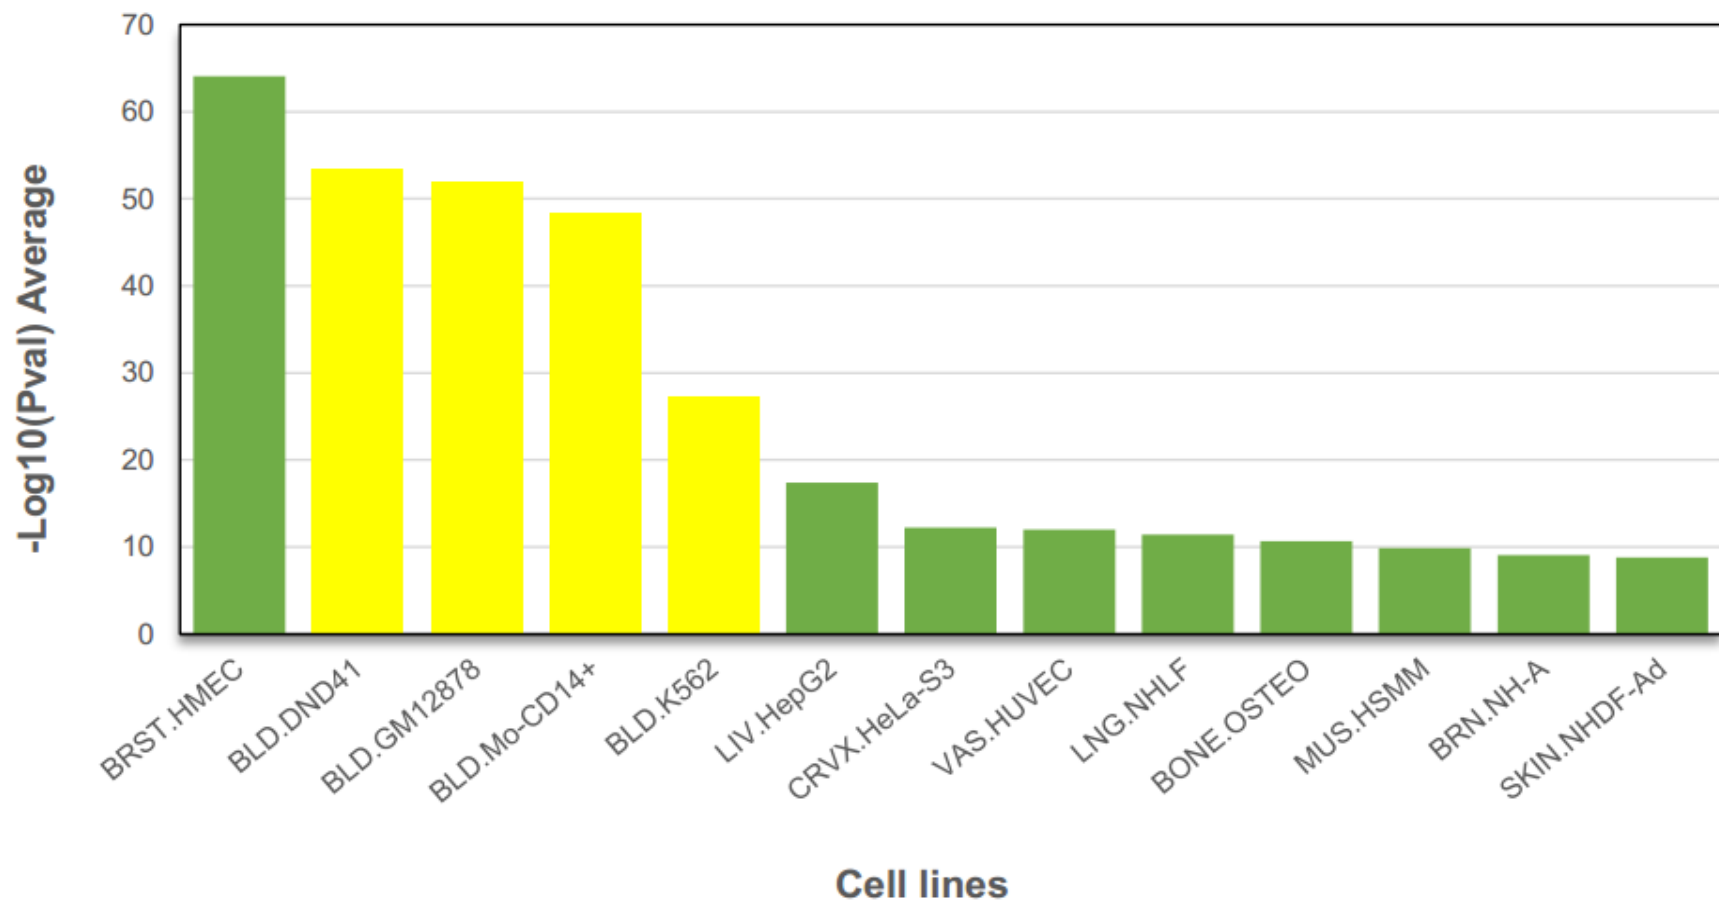

**Fig. S14**

# Supplementary Tables

Table S1: 11 eQTL datasets and matched ENCODE cell lines.

| <b>Abbr.</b>    | <b>eQTL Study</b>         | <b>Tissues/Cells</b>     | <b>Fine Mapped eQTLs<br/>(10% FDR)</b> | <b>ENCODE Mapped<br/>Cell Line</b> |
|-----------------|---------------------------|--------------------------|----------------------------------------|------------------------------------|
| <b>CPL</b>      | CAP_LCL                   | Lymphoblastoid cell line | 20,863                                 | GM12878                            |
| <b>GCL</b>      | GenCord_LCL               | Lymphoblastoid cell line | 2,390                                  | GM12878                            |
| <b>STL</b>      | Stranger_LCL              | Lymphoblastoid cell line | 12,117                                 | GM12878                            |
| <b>GCF</b>      | GenCord_fibroblast        | Blood fibroblast         | 2,702                                  | HUVEC                              |
| <b>GCT</b>      | GenCord_tcell             | Blood T cell             | 2,258                                  | DND41                              |
| <b>CLI</b>      | UChicago_liver            | Liver tissue             | 9,388                                  | HepG2                              |
| <b>MLI</b>      | Merck_liver               | Liver tissue             | 9,137                                  | HepG2                              |
| <b>HCE</b>      | Harvard_cerebellum        | Brain cerebellum         | 15,086                                 | NH-A                               |
| <b>HPC</b>      | Harvard_prefrontal_cortex | Brain prefrontal cortex  | 19,209                                 | NH-A                               |
| <b>HVC</b>      | Harvard_visual_cortex     | Brain visual cortex      | 13,450                                 | NH-A                               |
| <b>MBR</b>      | Myers_brain               | Brain cortical           | 3,338                                  | NH-A                               |
| <b>Geuvadis</b> | Geuvoids_LCL              | Lymphoblastoid cell line | 6,685                                  | GM12878                            |

Table S2: Occurrence of selected chromatin features in tissue/cell type-specific logit models. This table shows results from 11 eQTL datasets with random control around TSS.

| <b>Feature</b>      | <b>Occurrence</b> |
|---------------------|-------------------|
| H3K4me1 Hit         | 11                |
| H3K36me3 Hit        | 11                |
| DHS Hit             | 10                |
| H3K79me2 Hit        | 10                |
| H3K9me3 Hit         | 9                 |
| H3K27me3 Hit        | 8                 |
| H3K4me2 Intensity   | 7                 |
| H3K36me3 Intensity  | 6                 |
| H3K4me3 Intensity   | 6                 |
| H3K79me2 Centrality | 6                 |
| H4K20me1 Hit        | 5                 |
| H3K4me2 Hit         | 5                 |
| H3K9ac Intensity    | 5                 |
| H3K9me3 Intensity   | 5                 |
| H2AZ Centrality     | 5                 |
| H3K27ac Intensity   | 4                 |
| H3K27me3 Intensity  | 4                 |
| H3K4me1 Intensity   | 4                 |
| H3K27me3 Centrality | 4                 |
| H2AZ Hit            | 3                 |
| H4K20me1 Intensity  | 3                 |
| DHS Centrality      | 3                 |
| H3K4me2 Centrality  | 3                 |
| H3K27ac Hit         | 2                 |
| H3K9ac Hit          | 2                 |
| DHS Intensity       | 2                 |
| H2AZ Intensity      | 2                 |
| H3K27ac Centrality  | 2                 |
| H3K36me3 Centrality | 2                 |
| H3K4me1 Centrality  | 2                 |
| H3K4me3 Centrality  | 2                 |
| H3K9ac Centrality   | 2                 |
| H3K9me3 Centrality  | 2                 |
| H4K20me1 Centrality | 2                 |
| H3K4me3 Hit         | 1                 |
| H3K79me2 Intensity  | 1                 |

Table S3: Occurrence of selected chromatin features in cell type-specific logit models. This table shows results using 11 eQTL datasets with strict control.

| <b>Feature</b>           | <b>Occurrence</b> |
|--------------------------|-------------------|
| <b>H3K36me3 Hit</b>      | <b>11</b>         |
| <b>DHS Hit</b>           | <b>9</b>          |
| <b>H3K9me3 Intensity</b> | <b>9</b>          |
| <b>H3K4me1 Hit</b>       | <b>8</b>          |
| <b>H3K79me2 Hit</b>      | <b>7</b>          |
| <b>H4K20me1 Hit</b>      | <b>6</b>          |
| <b>H3K4me3 Intensity</b> | <b>6</b>          |
| H3K27ac Hit              | 5                 |
| H3K4me2 Intensity        | 5                 |
| H4K20me1 Intensity       | 5                 |
| DHS Centrality           | 5                 |
| H3K4me3 Centrality       | 5                 |
| H3K9me3 Hit              | 4                 |
| DHS Intensity            | 4                 |
| H2AZ Centrality          | 4                 |
| H3K27me3 Centrality      | 4                 |
| H3K4me2 Centrality       | 4                 |
| H3K27me3 Hit             | 3                 |
| H3K4me2 Hit              | 3                 |
| H3K27ac Centrality       | 3                 |
| H3K36me3 Centrality      | 3                 |
| H3K4me1 Centrality       | 3                 |
| H3K9ac Centrality        | 3                 |
| H3K9me3 Centrality       | 3                 |
| H2AZ Hit                 | 2                 |
| H3K9ac Hit               | 2                 |
| H2AZ Intensity           | 2                 |
| H3K27ac Intensity        | 2                 |
| H3K27me3 Intensity       | 2                 |
| H3K36me3 Intensity       | 2                 |
| H3K79me2 Intensity       | 2                 |
| H3K9ac Intensity         | 2                 |
| H3K4me1 Intensity        | 1                 |
| H3K79me2 Centrality      | 1                 |
| H4K20me1 Centrality      | 1                 |

Table S4: Occurrence of selected chromatin features (trained without DHS marks) in cell type-specific logit models. This table shows results using 11 eQTL datasets with random control around TSS.

| <b>Feature</b>             | <b>Occurrence</b> |
|----------------------------|-------------------|
| <b>H3K4me1 Hit</b>         | <b>11</b>         |
| <b>H3K36me3 Hit</b>        | <b>10</b>         |
| <b>H3K79me2 Hit</b>        | <b>10</b>         |
| <b>H3K27me3 Hit</b>        | <b>8</b>          |
| <b>H3K4me2 Intensity</b>   | <b>8</b>          |
| <b>H3K9me3 Hit</b>         | <b>8</b>          |
| <b>H3K27ac Hit</b>         | <b>6</b>          |
| <b>H3K36me3 Intensity</b>  | <b>6</b>          |
| <b>H3K4me3 Intensity</b>   | <b>6</b>          |
| <b>H3K79me2 Centrality</b> | <b>6</b>          |
| H3K4me2 Hit                | 5                 |
| H3K9ac Intensity           | 5                 |
| H3K9me3 Intensity          | 5                 |
| H4K20me1 Hit               | 5                 |
| H2AZ Hit                   | 4                 |
| H3K27me3 Centrality        | 4                 |
| H3K27me3 Intensity         | 4                 |
| H3K4me1 Intensity          | 4                 |
| H2AZ Centrality            | 3                 |
| H3K27ac Centrality         | 3                 |
| H3K4me2 Centrality         | 3                 |
| H3K9ac Centrality          | 3                 |
| H3K9me3 Centrality         | 3                 |
| H2AZ Intensity             | 2                 |
| H3K27ac Intensity          | 2                 |
| H3K36me3 Centrality        | 2                 |
| H3K4me1 Centrality         | 2                 |
| H3K4me3 Centrality         | 2                 |
| H3K4me3 Hit                | 2                 |
| H4K20me1 Centrality        | 2                 |
| H4K20me1 Intensity         | 2                 |
| H3K79me2 Intensity         | 1                 |
| H3K9ac Hit                 | 1                 |

Table S5: Occurrence of selected chromatin features (trained without DHS marks) in cell type-specific logit models. This table shows results using 11 eQTL datasets with strict control.

| <b>Feature</b>           | <b>Occurrence</b> |
|--------------------------|-------------------|
| <b>H3K36me3 Hit</b>      | <b>11</b>         |
| <b>H3K4me1 Hit</b>       | <b>8</b>          |
| <b>H3K4me3 Intensity</b> | <b>7</b>          |
| <b>H3K79me2 Hit</b>      | <b>7</b>          |
| <b>H3K9me3 Intensity</b> | <b>7</b>          |
| <b>H3K27ac Hit</b>       | <b>6</b>          |
| <b>H4K20me1 Hit</b>      | <b>6</b>          |
| H4K20me1 Intensity       | 6                 |
| H3K4me2 Hit              | 5                 |
| H3K4me2 Intensity        | 5                 |
| H3K4me3 Centrality       | 5                 |
| H3K9me3 Hit              | 5                 |
| H2AZ Centrality          | 4                 |
| H2AZ Hit                 | 4                 |
| H3K27me3 Centrality      | 4                 |
| H3K27me3 Hit             | 4                 |
| H3K4me2 Centrality       | 4                 |
| H3K9ac Centrality        | 4                 |
| H3K27ac Centrality       | 3                 |
| H3K36me3 Centrality      | 3                 |
| H3K9ac Hit               | 3                 |
| H2AZ Intensity           | 2                 |
| H3K27ac Intensity        | 2                 |
| H3K27me3 Intensity       | 2                 |
| H3K36me3 Intensity       | 2                 |
| H3K4me1 Centrality       | 2                 |
| H3K79me2 Centrality      | 2                 |
| H3K79me2 Intensity       | 2                 |
| H3K9ac Intensity         | 2                 |
| H3K9me3 Centrality       | 2                 |
| H3K4me1 Intensity        | 1                 |

Table S6: 13 GTEx eQTL datasets and matched Roadmap Epigenomics of tissues/cell lines.

| <b>Abbr</b>  | <b>GTEx Tissues</b>        | <b>Tissues/Cells</b>                                 | <b>GTEx single tissue eQTLs</b> | <b>127 Epigenomes Mapped Tissues/Cell Lines</b> |
|--------------|----------------------------|------------------------------------------------------|---------------------------------|-------------------------------------------------|
| <b>AS</b>    | Adipose_Subcutaneous       | Adipose Nuclei                                       | 105,321                         | E063                                            |
| <b>AA</b>    | Artery_Aorta               | Aorta                                                | 58,142                          | E065                                            |
| <b>AT</b>    | Artery_Tibial              | Blood fibroblast                                     | 151,755                         | E122                                            |
| <b>EMA</b>   | Esophagus_Mucosa           | Esophagus                                            | 99,548                          | E079                                            |
| <b>EMS</b>   | Esophagus_Muscularis       | Esophagus                                            | 109,017                         | E079                                            |
| <b>HLV</b>   | Heart_Left_Ventricle       | Left Ventricle                                       | 64,750                          | E095                                            |
| <b>LU</b>    | Lung                       | NHLF Lung Fibroblast Primary Cells                   | 126,603                         | E128                                            |
| <b>MS</b>    | Muscle_Skeletal            | HSMM cell derived Skeletal Muscle Myotubes Cell Line | 115,021                         | E121                                            |
| <b>NT</b>    | Nerve_Tibial               | H9 Derived Neuron Cultured Cells                     | 125,215                         | E010                                            |
| <b>SSELL</b> | Skin_Sun_Exposed_Lower_leg | NHDF-Ad Adult Dermal Fibroblast Primary Cells        | 117,171                         | E126                                            |
| <b>ST</b>    | Stomach                    | Fetal Stomach                                        | 40,140                          | E092                                            |
| <b>TH</b>    | Thyroid                    | Thymus                                               | 162,016                         | E112                                            |
| <b>WB</b>    | Whole_Blood                | Lymphoblastoid Cell Line                             | 145,917                         | E116                                            |

Table S7: Occurrence of selected chromatin features in cell type-specific logit models. This table shows results using 13 GTEx eQTL datasets.

| <b>Feature</b>      | <b>Occurrence</b> |
|---------------------|-------------------|
| DHS Hit             | 13                |
| H3K4me1 Hit         | 12                |
| H3K36me3 Hit        | 11                |
| H3K79me2 Hit        | 11                |
| H3K27me3 Hit        | 10                |
| H3K4me3 Intensity   | 9                 |
| H3K4me2 Intensity   | 8                 |
| H3K9me3 Intensity   | 8                 |
| H3K79me2 Centrality | 7                 |
| H3K27AC Intensity   | 7                 |
| DHS Centrality      | 7                 |
| H3K9me3 Hit         | 6                 |
| H3K36me3 Intensity  | 6                 |
| H4K20me1 Hit        | 6                 |
| H2AZ Centrality     | 6                 |
| H3K9ac Intensity    | 5                 |
| H3K27me3 Intensity  | 5                 |
| H3K4me1 Intensity   | 5                 |
| H3K27me3 Centrality | 5                 |
| H2AZ Hit            | 4                 |
| H4K20me1 Intensity  | 4                 |
| H3K4me2 Centrality  | 4                 |
| H3K27AC Hit         | 3                 |
| H3K9ac Hit          | 3                 |
| DHS Intensity       | 3                 |
| H3K36me3 Centrality | 3                 |
| H3K4me2 Hit         | 3                 |
| H3K4me3 Centrality  | 3                 |
| H2AZ Intensity      | 2                 |
| H3K27AC Centrality  | 2                 |
| H3K4me1 Centrality  | 2                 |
| H3K9ac Centrality   | 2                 |
| H3K9me3 Centrality  | 2                 |
| H3K4me3 Hit         | 2                 |
| H4K20me1 Centrality | 1                 |
| H3K79me2 Intensity  | 1                 |



Table S8: The model parameters for generalized condition-dependent model.

| Parameters          | Coefficients | EXP (Coef) | Std. Error | Z value | P value  | Significance |
|---------------------|--------------|------------|------------|---------|----------|--------------|
| (Intercept)         | -5.34E-01    | 5.86E-01   | 8.15E-03   | -65.513 | < 2E-16  | ***          |
| H3K4me1 Hit         | 1.05E+00     | 2.86E+00   | 4.11E-02   | 25.554  | < 2E-16  | ***          |
| H3K36me3 Hit        | 1.57E+00     | 4.79E+00   | 8.27E-02   | 18.932  | < 2E-16  | ***          |
| DHS Hit             | 1.21E+00     | 3.36E+00   | 4.87E-02   | 24.937  | < 2E-16  | ***          |
| H3K79me2 Hit        | 9.75E-01     | 2.65E+00   | 4.52E-02   | 21.577  | < 2E-16  | ***          |
| H3K9me3 Hit         | -4.84E-01    | 6.16E-01   | 5.81E-02   | -8.334  | < 2E-16  | ***          |
| H3K27me3 Hit        | 1.52E+00     | 4.55E+00   | 6.48E-02   | 23.389  | < 2E-16  | ***          |
| H3K4me2 Intensity   | 8.69E-04     | 1.00E+00   | 9.81E-05   | 8.86    | < 2E-16  | ***          |
| H3K4me3 Intensity   | 3.09E-04     | 1.00E+00   | 7.81E-05   | 3.955   | 7.66E-05 | ***          |
| H3K36me3 Intensity  | 4.35E-03     | 1.00E+00   | 1.12E-03   | 3.897   | 9.73E-05 | ***          |
| H3K79me2 Centrality | -1.50E-04    | 1.00E+00   | 3.06E-05   | -4.896  | 9.78E-07 | ***          |

Table S9: The top-mapped tissues/cell types among 38 immune and non-immune diseases/traits.

| Disease                                        | Disease/Trait                  | Epigenome Mnemonic         | Epigenome Name                                        | Anatomy                                            |
|------------------------------------------------|--------------------------------|----------------------------|-------------------------------------------------------|----------------------------------------------------|
| Autoimmune Disease                             | C reactive protein             | ESDR.CD184.ENDO            | hESC Derived CD184+ Endoderm Cultured Cells           | ESC_DERIVED                                        |
|                                                | Vitiligo                       | BLD.CD19.PPC               | Primary B cells from peripheral blood                 | BLOOD                                              |
|                                                | Asthma                         | BLD.CD4.CD25M.IL17P.PL.TPC | Primary T helper 17 cells PMA-I stimulated            | BLOOD                                              |
|                                                | Atopic dermatitis              | BLD.CD4.MPC                | Primary T helper memory cells from peripheral blood 2 | BLOOD                                              |
|                                                | Allergy                        | BLD.CD4.MPC                | Primary T helper memory cells from peripheral blood 2 | BLOOD                                              |
|                                                | Rheumatoid arthritis           | BLD.GM12878                | GM12878 Lymphoblastoid Cell Line                      | BLOOD                                              |
|                                                | Juvenile idiopathic arthritis  | BLD.CD4.CD25.CD127M.TREGPC | Primary T regulatory cells from peripheral blood      | BLOOD                                              |
|                                                | Type 1 diabetes                | BLD.CD3.PPC                | Primary T cells from peripheral blood                 | BLOOD                                              |
|                                                | Autoimmune thyroiditis         | BLD.CD19.CPC               | Primary B cells from cord blood                       | BLOOD                                              |
|                                                | Behcets disease                | BLD.DND41.CNCR             | Dnd41 TCell Leukemia Cell Line                        | BLOOD                                              |
|                                                | Primary sclerosing cholangitis | ADRL.GLND.FET              | Fetal Adrenal Gland                                   | ADRENAL                                            |
|                                                | Primary biliary cirrhosis      | BLD.GM12878                | GM12878 Lymphoblastoid Cell Line                      | BLOOD                                              |
|                                                | Multiple sclerosis             | BLD.CD3.PPC                | Primary T cells from peripheral blood                 | BLOOD                                              |
|                                                | Celiac disease                 | BLD.CD3.CPC                | Primary T cells from peripheral blood                 | BLOOD                                              |
|                                                | Systemic lupus erythematosus   | BLD.GM12878                | GM12878 Lymphoblastoid Cell Line                      | BLOOD                                              |
|                                                | Systemic sclerosis             | BLD.CD4.CD25M.IL17P.PL.TPC | Primary T helper 17 cells PMA-I stimulated            | BLOOD                                              |
|                                                | Ankylosing spondylitis         | BLD.CD14.MONO              | Monocytes-CD14+ RO01746 Cell Line                     | BLOOD                                              |
|                                                | Alopecia areata                | BLD.CD4.CD25.CD127M.TREGPC | Primary T regulatory cells from peripheral blood      | BLOOD                                              |
|                                                | Psoriasis                      | BLD.GM12878                | GM12878 Lymphoblastoid Cell Line                      | BLOOD                                              |
|                                                | Non-Autoimmune Disease         | Crohns disease             | BLD.CD4.CD25M.CD45RA.NPC                              | Primary T helper naive cells from peripheral blood |
| Ulcerative colitis                             |                                | SKIN.PEN.FRSK.FIB.02       | Foreskin Fibroblast Primary Cells skin02              | SKIN                                               |
| Kawasaki disease                               |                                | BLD.DND41.CNCR             | Dnd41 TCell Leukemia Cell Line                        | BLOOD                                              |
| Renal function related traits                  |                                | KID.FET                    | Fetal Kidney                                          | KIDNEY                                             |
| Liver enzyme levels gamma glutamyl transferase |                                | GI.L.INT.FET               | Fetal Intestine Large                                 | INTESTINE                                          |
| Urate levels                                   |                                | LIV.HEPG2.CNCR             | HepG2 Hepatocellular Carcinoma Cell Line              | LIVER                                              |
| Bone mineral density                           |                                | ESC.I3                     | ES-I3 Cell Line                                       | ESC                                                |
| Type 2 diabetes                                |                                | BRST.HMEC                  | HMEC Mammary Epithelial Primary Cells                 | BREAST                                             |
| Alzheimer's combined                           |                                | BRN.ANG.GYR                | Brain Angular Gyrus                                   | BRAIN                                              |
| Restless legs syndrome                         |                                | BRN.FET.M                  | Fetal Brain Male                                      | BRAIN                                              |
| HDL cholesterol                                |                                | LIV.HEPG2.CNCR             | HepG2 Hepatocellular Carcinoma Cell Line              | LIVER                                              |
| LDL cholesterol                                |                                | LIV.ADLT                   | Adult Liver                                           | LIVER                                              |
| Triglycerides                                  |                                | LIV.ADLT                   | Adult Liver                                           | LIVER                                              |
| Fasting glucose related traits                 |                                | FAT.ADIP.DR.MSC            | Adipose Derived Mesenchymal Stem Cell Cultured Cells  | FAT                                                |
| Progressive supranuclear palsy                 |                                | IPSC.20B                   | iPS-20b Cell Line                                     | IPSC                                               |
| Red blood cell traits                          |                                | BLD.K562.CNCR              | K562 Leukemia Cell Line                               | BLOOD                                              |
| Platelet counts                                |                                | PLCNT.FET                  | Placenta                                              | PLACENTA                                           |
| Creatinine levels                              |                                | SKIN.PEN.FRSK.FIB.01       | Foreskin Fibroblast Primary Cells skin01              | SKIN                                               |
| Migraine                                       |                                | SKIN.PEN.FRSK.MEL.03       | Foreskin Melanocyte Primary Cells skin03              | SKIN                                               |

Table S10: The prioritization result for 17 LDL-C-associated SNPs using the ENCODE HepG2 epigenome. Base on combined probability, SNP rs12740374 (bold) was ranked fifth highest in our final prioritization list.

| Chr | Pos       | SNP_Id            | GWAS_P <sup>1</sup> | Cell_P <sup>2</sup> | BF <sup>3</sup> | Composite_P <sup>4</sup> | Combined_P <sup>5</sup> |
|-----|-----------|-------------------|---------------------|---------------------|-----------------|--------------------------|-------------------------|
| 1   | 109826136 | rs657420          | 1.30E-09            | 0.805254            | 106294.4        | 0.138369                 | 0.222845                |
| 1   | 109817838 | rs660240          | 8.30E-41            | 0.888678            | 146693.7        | 0.10557                  | 0.187636                |
| 1   | 109818530 | rs646776          | 2.20E-41            | 0.888678            | 10592.66        | 0.060044                 | 0.10672                 |
| 1   | 109818306 | rs629301          | 2.20E-41            | 0.703519            | 7746.132        | 0.063475                 | 0.089312                |
| 1   | 109817590 | <b>rs12740374</b> | 1.80E-42            | 0.73613             | 10149.74        | 0.059073                 | 0.086971                |
| 1   | 109815252 | rs611917          | 8.90E-29            | 0.36963             | 1695.044        | 0.060724                 | 0.044891                |
| 1   | 109820919 | rs17035949        | 1.00E-06            | 0.626575            | 2727.231        | 0.03028                  | 0.037945                |
| 1   | 109827253 | rs672569          | 2.00E-14            | 0.36963             | 1217.414        | 0.050151                 | 0.037075                |
| 1   | 109814880 | rs4970834         | 1.60E-25            | 0.36963             | 933.5832        | 0.048641                 | 0.035959                |
| 1   | 109807283 | rs6657811         | 3.30E-22            | 0.36963             | 76.95873        | 0.020686                 | 0.015293                |
| 1   | 109813719 | rs17035665        | 0.00047             | 0.36963             | 87.71737        | 0.015119                 | 0.011177                |
| 1   | 109821511 | rs602633          | 7.60E-41            | 0.626575            | 30.79655        | 0.008176                 | 0.010246                |
| 1   | 109822166 | rs599839          | 7.30E-42            | 0.779509            | 4.377628        | 0.0041                   | 0.006393                |
| 1   | 109804646 | rs4970833         | 4.20E-11            | 0.36963             | 5.983847        | 0.003687                 | 0.002726                |
| 1   | 109810981 | rs17035630        | 0.0066              | 0.36963             | 1.384568        | 0.001954                 | 0.001444                |
| 1   | 109810544 | rs2281894         | 7.20E-05            | 0.36963             | 1.71544         | 0.001058                 | 0.000782                |
| 1   | 109807099 | rs6689614         | 4.60E-11            | 0.36963             | 2.897931        | 0.000706                 | 0.000522                |

1. GWAS\_P: the original GWAS *P*-value; 2. the regulatory probability for the condition-dependent model using HepG2 epigenomes; 3. BF: the Bayes factor of the composite model; 4. Composite\_P: the probability for the composite model; 5: the posterior probability of the full model.

Table S11: Functional evidence of the top five SNPs using the HepG2 epigenome.

| Chr | Pos       | SNP_ID     | GWAS Trait   The most significant P-value   PMID (From GWASdb[1])                                                                                                                                                                                                                                                                                                                                                                                                                                                                                                                                                           | eQTL tissue/cell   Associated gene   The most significant P-value   PMID                                                                                                                                                                                                                                                                                                                                                                                                                                                                            | TF motif   Alleles   Log(P-value for binding affinity) change (From GWAS3D[2])                                                                                                                                                            |
|-----|-----------|------------|-----------------------------------------------------------------------------------------------------------------------------------------------------------------------------------------------------------------------------------------------------------------------------------------------------------------------------------------------------------------------------------------------------------------------------------------------------------------------------------------------------------------------------------------------------------------------------------------------------------------------------|-----------------------------------------------------------------------------------------------------------------------------------------------------------------------------------------------------------------------------------------------------------------------------------------------------------------------------------------------------------------------------------------------------------------------------------------------------------------------------------------------------------------------------------------------------|-------------------------------------------------------------------------------------------------------------------------------------------------------------------------------------------------------------------------------------------|
| 1   | 109826136 | rs657420   | LDL cholesterol   3.94E-16   23063622, 20686566                                                                                                                                                                                                                                                                                                                                                                                                                                                                                                                                                                             | Skin_Sun_Exposed_Lower_leg   AMIGO1   2.51E-08   25954001<br>Skin_Not_Sun_Exposed_Suprapubic   AMIGO1   2.59E-08   25954001<br>Adipose_Subcutaneous   AMIGO1   5.29E-08   25954001<br>Cells_Transformed_fibroblasts   AMIGO1   2.17E-07   25954001<br>Nerve_Tibial   AMIGO1   5.05E-07   25954001<br>Muscle_Skeletal   AMIGO1   4.13E-06   25954001<br>Nerve_Tibial   SYPL2   1.15E-06   25954001<br>Thyroid   AMIGO1   1.20E-06   25954001<br>Whole_Blood   SORT1   2.92E-06   24013639<br>Thyroid   PSRC1   1.09E-05   25954001                   | YY1_known2   C/T   -3.219181 -> -8.108031<br>E2F_known5   C/T   -6.719181 -> -3.765598<br>HNF4_known2   C/T   -7.217416 -> -4.38194<br>E2F_known2   C/T   -6.695662 -> -3.914967<br>ZBTB33_known1   C/T   -4.644391 -> -7.130899          |
| 1   | 109817838 | rs660240   | LDL cholesterol   8.30E-41   20686566, 23063622, 18262040<br>Coronary heart disease   1.00E-26   20864672<br>Cardiovascular disease risk factors   2.00E-22   21943158<br>Lipoprotein-associated phospholipase A2 mass   7.39E-17   22003152<br>Metabolite levels   2.38E-12   22286219                                                                                                                                                                                                                                                                                                                                     | Muscle_Skeletal   CELSR2   1.60E-32   25954001<br>Liver   SORT1   3.33E-19   25954001<br>Liver   PSRC1   3.78E-14   25954001<br>Liver   CELSR2   3.17E-13   25954001<br>Esophagus_Mucosa   PSRC1   4.25E-10   25954001<br>Testis   PSRC1   3.79E-08   25954001<br>Pancreas   PSRC1   2.83E-07   25954001<br>Whole_Blood   PSRC1   4.52E-07   25954001<br>Brain_Cortex   PSRC1   1.93E-06   25954001                                                                                                                                                 | BRCA1_known2   T/C   -14.436087 -> -10.375644<br>E2F_known8   T/C   -4.207875 -> -6.884375<br>GR_known6   T/C   -5.630754 -> -3.0<br>GATA_known8   T/C   -6.330637 -> -8.892992<br>E2F_known2   T/C   -3.238518 -> -5.650919              |
| 1   | 109818530 | rs646776   | LDL cholesterol   7.90E-74   23063622, 18193044, 18262040, 20686566, 19060910<br>Lipid levels   1.77E-53   19936222, 19060911, 19802338, 19913121, 23236364<br>Apolipoprotein B levels   3.90E-41   23100282<br>Progranulin levels   2.00E-30   21087763<br>Multiple cancers   6.10E-28   23103227<br>Lipoprotein-associated phospholipase A2 activity and mass   2.15E-17<br>22003152   22003152<br>Metabolite levels   2.65E-12   22286219<br>Coronary heart disease   7.90E-12   21966275, 21347282, 21378988<br>Myocardial infarction   8.00E-12   19198609<br>Cardiovascular disease risk factors   9.37E-9   21943158 | Muscle_Skeletal   CELSR2   1.06E-34   25954001<br>Liver   CELSR2   3.09E-24   18462017<br>Liver   SORT1   3.44E-20   25954001<br>Liver   PSRC1   1.57E-15   25954001<br>Liver   CELSR2   5.44E-15   25954001<br>Esophagus_Mucosa   PSRC1   1.24E-11   25954001<br>Whole_Blood   PSRC1   1.98E-07   25954001<br>Liver   PSMAS   2.44E-07   18462017<br>Pancreas   PSRC1   3.49E-07   25954001<br>Testis   PSRC1   5.60E-07   25954001<br>Brain_Cortex   PSRC1   8.68E-07   25954001<br>Skin_Not_Sun_Exposed_Suprapubic   PSRC1   2.73E-06   25954001 | GATA_known14   C/T   -4.369146 -> -6.877495<br>Myc_known8   C/T   -5.789017 -> -3.305023<br>GATA_known10   C/T   -3.462016 -> -5.929344<br>GR_known2   C/T   -5.291566 -> -3.0<br>YY1_known3   C/T   -6.471606 -> -4.217397               |
| 1   | 109818306 | rs629301   | LDL cholesterol   5.00E-241   24097068, 20686565, 23063622, 18262040, 20686566, 21541012, 19913121<br>Lipoprotein-associated phospholipase A2 activity and mass   1.78E-17   22003152<br>Metabolite levels   2.62E-12   22286219                                                                                                                                                                                                                                                                                                                                                                                            | Muscle_Skeletal   CELSR2   1.06E-34   25954001<br>Liver   SORT1   3.44E-20   25954001<br>Liver   PSRC1   1.57E-15   25954001<br>Liver   CELSR2   5.44E-15   25954001<br>Esophagus_Mucosa   PSRC1   1.24E-11   25954001<br>Whole_Blood   PSRC1   1.98E-07   25954001<br>Pancreas   PSRC1   3.49E-07   25954001<br>Testis   PSRC1   5.60E-07   25954001<br>Brain_Cortex   PSRC1   8.68E-07   25954001<br>Skin_Not_Sun_Exposed_Suprapubic   PSRC1   2.73E-06   25954001                                                                                | YY1_known6   G/T   -7.699671 -> -12.724866<br>YY1_known2   G/T   -6.454206 -> -11.0021<br>Mef2_known2   G/T   -11.781189 -> -8.729368<br>YY1_known5   G/T   -6.376764 -> -9.09393<br>Pou2f2_known5   G/T   -3.967087 -> -6.46091          |
| 1   | 109817590 | rs12740374 | LDL cholesterol   3.75E-69   23063622, 22629316, 19060906, 20686566, 23236364, 18262040, 21541012, 19913121<br>Lipoprotein-associated phospholipase A2 activity and mass   2.00E-22   23118302, 22003152<br>Metabolic syndrome phenotype   8.00E-16   22022282<br>Metabolite levels   1.24E-11   22286219                                                                                                                                                                                                                                                                                                                   | Muscle_Skeletal   CELSR2   1.16E-35   25954001<br>Liver   SORT1   4.01E-27   25954001<br>Liver   CELSR2   5.16E-19   25954001<br>Liver   PSRC1   5.64E-19   25954001<br>Esophagus_Mucosa   PSRC1   5.59E-12   25954001<br>Pancreas   PSRC1   7.16E-07   25954001<br>Whole_Blood   PSRC1   2.07E-06   25954001<br>Testis   PSRC1   5.69E-06   25954001<br>Esophagus_Mucosa   CELSR2   4.98E-06   25954001<br>Skin_Sun_Exposed_Lower_leg   CELSR2   7.33E-06   25954001                                                                               | CEBPB_known1   G/T   -8.132542 -> -14.392124<br>CEBPB_known3   G/T   -6.464692 -> -12.172171<br>CEBPB_known5   G/T   -9.26345 -> -14.369396<br>CEBPB_known6   G/T   -6.525939 -> -10.785877<br>BRCA1_known2   G/T   -3.57882 -> -6.866675 |

[1] Li MJ, et al. 2016. GWASdb v2: an update database for human genetic variants identified by genome-wide association studies. *Nucleic Acids Res.*

[2] Li MJ, et al. 2013. GWAS3D: Detecting human regulatory variants by integrative analysis of genome-wide associations, chromosome interactions and histone modifications. *Nucleic Acids Res.*

Table S12: Potential novel RA regulatory SNPs with moderate significant P-values. These candidates were prioritized using blood Mo-CD14+ epigenomic marks (Top 50).

| <b>SNP</b>  | <b>Combined_P*</b> | <b>GWAS<br/>P-value</b> | <b>SNP</b>  | <b>Combined_P*</b> | <b>GWAS<br/>P-value</b> |
|-------------|--------------------|-------------------------|-------------|--------------------|-------------------------|
| rs874628    | 0.506966           | 0.00036                 | rs695871    | 0.303774           | 0.0003                  |
| rs1933437   | 0.453914           | 0.00023                 | rs2076615   | 0.29915            | 0.00022                 |
| rs1050069   | 0.452307           | 0.00016                 | rs55960411  | 0.293754           | 0.00056                 |
| rs149271    | 0.445721           | 0.00097                 | rs752118    | 0.293195           | 9.00E-05                |
| rs1126931   | 0.414567           | 0.00052                 | rs61776582  | 0.292749           | 0.00056                 |
| rs34891485  | 0.398838           | 0.00014                 | rs4845635   | 0.290597           | 0.00019                 |
| rs7097397   | 0.3932             | 0.00039                 | rs1453559   | 0.286038           | 6.60E-08                |
| rs17227424  | 0.389769           | 0.00085                 | rs8011558   | 0.284322           | 4.40E-06                |
| rs74929644  | 0.373818           | 0.00046                 | rs16891427  | 0.280171           | 1.10E-05                |
| rs1800686   | 0.366551           | 9.00E-05                | rs7198606   | 0.279276           | 0.00053                 |
| rs118054983 | 0.34874            | 3.60E-05                | rs3757386   | 0.273307           | 0.0004                  |
| rs3825568   | 0.343718           | 3.70E-06                | rs141333506 | 0.270571           | 0.0007                  |
| rs113892147 | 0.342055           | 7.60E-05                | rs4657055   | 0.269013           | 0.00077                 |
| rs12889006  | 0.341814           | 4.00E-06                | rs79858408  | 0.265983           | 0.00044                 |
| rs33959228  | 0.335268           | 0.00016                 | rs1465788   | 0.265486           | 3.50E-06                |
| rs17751061  | 0.324599           | 0.00011                 | rs117820542 | 0.264112           | 0.00045                 |
| rs710845    | 0.322226           | 0.00084                 | rs187060419 | 0.262165           | 0.00047                 |
| rs4808970   | 0.318964           | 6.30E-05                | rs73740408  | 0.262047           | 0.00023                 |
| rs3746435   | 0.315127           | 0.00053                 | rs6573857   | 0.259303           | 3.60E-06                |
| rs2070179   | 0.313192           | 0.00093                 | rs470082    | 0.258763           | 3.60E-06                |
| rs113233347 | 0.311692           | 0.0008                  | rs6990813   | 0.256012           | 0.00033                 |
| rs174538    | 0.310173           | 0.00025                 | rs6060266   | 0.255235           | 0.00091                 |
| rs10747783  | 0.30991            | 9.10E-06                | rs2072052   | 0.254986           | 1.60E-05                |
| rs874881    | 0.307804           | 0.00016                 | rs34480360  | 0.253426           | 4.20E-06                |
| rs10849962  | 0.304733           | 0.00083                 | rs138913261 | 0.252925           | 0.00016                 |

\*Combined\_P: the posterior probability of the full model.

Table S13: The ratio of effective number of independent markers on each chromosome. In most chromosomes, the ratios are larger than original GWAS signals, indicating that context-dependent model improved the discovery of GWAS SNPs by identifying more LD-independent signals.

| CELLS (%)           | chr1 | chr2 | chr3 | chr4 | chr5 | chr6 | chr7 | chr8 | chr9 | chr10 | chr11 | chr12 | chr13 | chr14 | chr15 | chr16 | chr17 | chr18 | chr19 | chr20 | chr21 | chr22 | chrX |
|---------------------|------|------|------|------|------|------|------|------|------|-------|-------|-------|-------|-------|-------|-------|-------|-------|-------|-------|-------|-------|------|
| <b>BLD.DND41</b>    | 0.32 | 0.3  | 0.16 | 0.07 | 0.1  | 0.32 | 0.11 | 0.15 | 0.18 | 0.39  | 0.13  | 0.15  | 0     | 0.23  | 0.15  | 0.08  | 0.1   | 0.12  | 0.2   | 0     | 1.02  | 0.21  | 0.76 |
| <b>BLD.GM12878</b>  | 0.31 | 0.27 | 0.21 | 0.06 | 0.09 | 0.47 | 0.22 | 0.09 | 0.16 | 0.4   | 0.11  | 0.12  | 0     | 0.26  | 0.13  | 0.07  | 0.13  | 0.22  | 0.12  | 0.09  | 1.11  | 0.31  | 0.62 |
| <b>CRVX.HeLa-S3</b> | 0.31 | 0.25 | 0.15 | 0    | 0.09 | 0.35 | 0.13 | 0.06 | 0.12 | 0.23  | 0.04  | 0.1   | 0     | 0.17  | 0     | 0.08  | 0.1   | 0     | 0.14  | 0     | 0.72  | 0.11  | 0.48 |
| <b>LIV.HepG2</b>    | 0.28 | 0.21 | 0.15 | 0    | 0.05 | 0.22 | 0.21 | 0.13 | 0.11 | 0.26  | 0.12  | 0.09  | 0     | 0.26  | 0.07  | 0.06  | 0.12  | 0.12  | 0.16  | 0.05  | 0.96  | 0.27  | 0.76 |
| <b>BRST.HMEC</b>    | 0.26 | 0.17 | 0.07 | 0.11 | 0    | 0.26 | 0.15 | 0.05 | 0.13 | 0.33  | 0.13  | 0.1   | 0     | 0.19  | 0.06  | 0.08  | 0.1   | 0.1   | 0.13  | 0.07  | 0.53  | 0.32  | 0.46 |
| <b>MUS.HSMM</b>     | 0.27 | 0.24 | 0.15 | 0    | 0.04 | 0.29 | 0.09 | 0.05 | 0.11 | 0.37  | 0.09  | 0.14  | 0.09  | 0.19  | 0.06  | 0.09  | 0.09  | 0.1   | 0.1   | 0     | 0.52  | 0.1   | 0.5  |
| <b>VAS.HUVEC</b>    | 0.28 | 0.19 | 0.15 | 0    | 0.08 | 0.3  | 0.14 | 0    | 0.12 | 0.3   | 0.08  | 0.13  | 0.09  | 0.19  | 0     | 0.08  | 0.1   | 0.1   | 0.2   | 0.08  | 0.36  | 0.16  | 0.49 |
| <b>BLD.K562</b>     | 0.31 | 0.3  | 0.17 | 0.13 | 0.15 | 0.32 | 0.16 | 0.12 | 0.11 | 0.22  | 0.08  | 0.12  | 0     | 0.24  | 0.07  | 0.08  | 0.11  | 0.24  | 0.2   | 0.08  | 0.69  | 0.23  | 0.64 |
| <b>BLD.Mo-CD14+</b> | 0.31 | 0.2  | 0.22 | 0    | 0.04 | 0.34 | 0.22 | 0.13 | 0.1  | 0.2   | 0.12  | 0.16  | 0     | 0.24  | 0.14  | 0.08  | 0.13  | 0.12  | 0.23  | 0.07  | 0.35  | 0.14  | 0.62 |
| <b>BRN.NH-A</b>     | 0.29 | 0.21 | 0.16 | 0.05 | 0.04 | 0.25 | 0.12 | 0.05 | 0.06 | 0.43  | 0.1   | 0.14  | 0.09  | 0.19  | 0.13  | 0.08  | 0.11  | 0.1   | 0.14  | 0.08  | 0.37  | 0.15  | 0.49 |
| <b>SKIN.NHDF-Ad</b> | 0.26 | 0.29 | 0.14 | 0.11 | 0.08 | 0.31 | 0.09 | 0.05 | 0.11 | 0.39  | 0.08  | 0.11  | 0     | 0.25  | 0     | 0.08  | 0.09  | 0.1   | 0.15  | 0     | 0.7   | 0.16  | 0.55 |
| <b>LNG.NHLF</b>     | 0.23 | 0.26 | 0.15 | 0.05 | 0.04 | 0.26 | 0.15 | 0.05 | 0.07 | 0.4   | 0.12  | 0.09  | 0     | 0.26  | 0.12  | 0.07  | 0.11  | 0.11  | 0.18  | 0.07  | 0.36  | 0.14  | 0.55 |
| <b>BONE.OSTEO</b>   | 0.33 | 0.22 | 0.12 | 0    | 0.04 | 0.29 | 0.19 | 0.11 | 0.1  | 0.33  | 0.13  | 0.04  | 0     | 0.21  | 0     | 0.09  | 0.11  | 0.11  | 0.17  | 0.07  | 0.74  | 0.1   | 0.7  |
| <b>composite</b>    | 0.25 | 0.27 | 0.12 | 0    | 0    | 0.22 | 0.12 | 0.11 | 0.14 | 0.31  | 0.13  | 0.07  | 0.1   | 0.24  | 0.06  | 0.07  | 0.13  | 0.1   | 0.13  | 0.07  | 0.54  | 0.14  | 0.43 |
| <b>GWAS</b>         | 0.09 | 0.06 | 0.02 | 0.02 | 0.03 | 0.08 | 0.02 | 0.02 | 0.02 | 0.04  | 0.03  | 0.02  | 0.02  | 0.01  | 0.05  | 0.02  | 0.03  | 0.04  | 0.05  | 0.02  | 0.1   | 0.04  | 0.03 |

Note: '0' means no SNPs on the particular chromosome satisfied rheumatoid arthritis GWAS  $P < 1 \times 10^{-5}$  after prioritization.

Table S14: Results of the pathway enrichment analysis (-Log10FDR) using improved genes. Weighting by blood cell lines (especially Mo-CD14+ and GM12878) show higher enrichment in immune system pathways than weighting by other tissues/cell types.

| CELLS           | IMMUNE SYSTEM | IMMUNOREGULATORY INTERACTIONS | INNATE IMMUNE SYSTEM | ADAPTIVE IMMUNE SYSTEM | CYTOKINE SIGNALING IN IMMUNE SYSTEM |
|-----------------|---------------|-------------------------------|----------------------|------------------------|-------------------------------------|
| BLD<br>Mo-CD14+ | 6.43          | 1.99                          | 0                    | 2.4                    | 4.18                                |
| BLD<br>GM12878  | 4.91          | 0                             | 1.4                  | 0                      | 2.51                                |
| BLD<br>DND41    | 4.6           | 1.71                          | 0                    | 1.71                   | 1.4                                 |
| BLD<br>K562     | 3.86          | 0                             | 0                    | 0                      | 1.79                                |
| LIV<br>HepG2    | 3.56          | 0                             | 0                    | 0                      | 1.6                                 |
| BONE<br>OSTEO   | 3.26          | 0                             | 0                    | 0                      | 3.39                                |
| BRN<br>NH-A     | 2.92          | 0                             | 0                    | 0                      | 2.89                                |
| LNG<br>NHLF     | 2.27          | 0                             | 0                    | 0                      | 0                                   |
| VAS<br>HUVEC    | 2.15          | 0                             | 0                    | 0                      | 2.35                                |
| CRVX<br>HeLa-S3 | 1.84          | 0                             | 0                    | 0                      | 0                                   |
| BRST<br>HMEC    | 1.63          | 0                             | 0                    | 0                      | 0                                   |
| MUS<br>HSMM     | 0             | 0                             | 0                    | 0                      | 1.78                                |
| SKIN<br>NHDF-Ad | 0             | 0                             | 0                    | 0                      | 0                                   |

Note: '0' means the relevant pathway is not significantly enriched (FDR > 0.05) in the analysis.

Abbreviations: BLD - Blood; LNG - Lung; SKIN - Skin; BONE - Bone; LIV - Liver; VAS - Vascular; MUS - Muscle; BRN - Brain; CRVX - Cervix; BRST - Breast.
